# Supplementary material
Source: PubMed Central journal article supplement (PMC5808361)
Supplement: jm7b01674_si_001.pdf [file jm7b01674_si_001.pdf]

finger: pubsdm\_prod: no such user.

MANUSCRIPT COVER SHEET for jm7b01674

Journal ID: jm

MSC No: jm7b01674

DOTS STAGE: WaitProof

Tech Editor: pubsdm\_prod

Freelance Edited: N

Title: Discovery of Potent and Selective  
Allosteric Inhibitors of Protein Arginine Methyltransferase 3 (PRMT3)

Author Names: H. Umit Kaniskan, Mohammad S. Eram, Kehao Zhao, Magdalena M. Szewczyk, Xiaobao Yang, Keith Schmidt, Xiao Luo, Sean Xiao, Miao Dai, Feng He, Irene Zang, Ying Lin, Fengling Li, Elena Dobrovetsky, David Smil, Sun-Joon Min, Jennifer Lin-Jones, Matthieu Schapira, Peter Atadja, En Li, Dalia Barsyte-Lovejoy, Cheryl H. Arrowsmith, Peter J. Brown, Feng Liu, Zhengtian Yu, Masoud Vedadi, Jian Jin

MSC Type/Subtype: a - Article

Special Issue/Section Title:

Editor Office Handling MSC: Brian S.J. Blagg

Editor Received Date: 11/13/2017 AM

Editor Revised Received Date: 12/4/2017 PM

Editor Accepted Date: 12/15/2017 PM

Relationship/Related Papers:

Intended Issue Date:

Batch Number: 00000

Copyright Valid?: Y

Copyright Type?: STD

SI Present?: Y

No. of WEOs: 0

Cover Art?: N

Newsworthy?: N

Hot Paper?: N

Color Graphics (proof pp.):

Issue Planning Notes:

Synopsis/TOC Depth: 0

Page Size (decimal): 12.82

#### PRIMARY CONTACT INFORMATION

Author: Dr. Jian Jin

Email: jian.jin@mssm.edu

Phone:

Fax: 212-849-2456

Institution: Icahn School of Medicine at Mount Sinai

Dept.: Pharmacological Sciences

Address1: One Gustave L. Levy Place, Box 1677

Address2: Icahn Medical Center, Room 16-20B

City, State, Zip: New York, New York, 10029

Country: United States

Compose Messages:

Printed: 01/02/18\_17:34:20 (Tue Jan 2 17:34:20 EST 2018)

Messages follow:

Warning could not locate DOTS AIN PDF

Discovery of Potent and Selective Allosteric Inhibitors of Protein Arginine Methyltransferase 3 (PRMT3).

H. Umit Kaniskan,<sup>1†,‡</sup> Mohammad S. Eram,<sup>2‡,‡</sup> Kehao Zhao,<sup>3§</sup> Magdalena M. Szewczyk,<sup>2‡</sup> Xiaobao Yang,<sup>1†,4</sup> Keith Schmidt,<sup>1†</sup> Xiao Luo,<sup>3§</sup> Sean Xiao,<sup>3§</sup> Miao Dai,<sup>3§</sup> Feng He,<sup>3§</sup> Irene Zang,<sup>3§</sup> Ying Lin,<sup>3§</sup> Fengling Li,<sup>2‡</sup> Elena Dobrovetsky,<sup>2‡</sup> David Smil,<sup>2‡</sup> Sun-Joon Min,<sup>1†,5</sup> Jennifer Lin-Jones,<sup>6||</sup> Matthieu Schapira,<sup>2‡,7⊥</sup> Peter Atadja,<sup>3§</sup> En Li,<sup>3§</sup> Dalia Barsyte-Lovejoy,<sup>2‡</sup> Cheryl H. Arrowsmith,<sup>2‡,8#</sup> Peter J. Brown,<sup>2‡</sup> Feng Liu,<sup>\*,9∇</sup> Zhengtian Yu,<sup>\*,3§</sup> Masoud Vedadi,<sup>\*,2‡,7⊥</sup> and Jian Jin,<sup>\*,1†</sup>

<sup>‡</sup> Center for Chemical Biology and Drug Discovery, Departments of Pharmacological Sciences and Oncological Sciences, Tisch Cancer Institute, Icahn School of Medicine at Mount Sinai, New York, NY New York 10029, USA United States.

<sup>2‡</sup> Structural Genomics Consortium, University of Toronto, Toronto, ON M5G 1L7, Canada.

<sup>3§</sup> Novartis Institutes for Biomedical Research (China), Zhangjiang Hi-Tech Park, Pudong New Area, Shanghai 201203, China.

<sup>6||</sup> DiscoverX Corporation, Fremont, CA California 94538, USA United States.

<sup>7⊥</sup> Department of Pharmacology and Toxicology, University of Toronto, Toronto, ON M5S 1A8, Canada.

<sup>8#</sup> Department of Medical Biophysics, University of Toronto and Princess Margaret Cancer Centre, 101 College St. Street, MaRS South Tower, Suite 707, Toronto, ON, M5G 1L7, Canada.

<sup>9∇</sup> Jiangsu Key Laboratory of Translational Research and Therapy for Neuro-Psycho-Diseases and Department of Medicinal Chemistry, College of Pharmaceutical Sciences, Soochow University, Suzhou, Jiangsu 215123, China.

\* Corresponding Authors (F.L.: e) E-mail: [fliu2@suda.edu.cn](mailto:fliu2@suda.edu.cn); phone: Phone: +86 (512) 65882569 |

\* (Z.Y.: e) E-mail: [zhengtian.yu@novartis.com](mailto:zhengtian.yu@novartis.com); phone: Phone: 18621082583 |

\* (M.V.: e) E-mail: [m.vedadi@utoronto.ca](mailto:m.vedadi@utoronto.ca); phone: Phone: (416) 976-0897 |

\* (J.J.: e) E-mail: [jian.jin@mssm.edu](mailto:jian.jin@mssm.edu); phone: Phone: (212) 659-8699 |

PRMT3 catalyzes the asymmetric dimethylation of arginine residues of various proteins. It is crucial for maturation of ribosomes, and has been implicated in several diseases. We recently disclosed a highly potent, selective, and cell-active allosteric inhibitor of PRMT3, compound **4**. Here, we report comprehensive structure-activity relationship studies that target the allosteric binding site of PRMT3. We conducted design, synthesis, and evaluation of novel compounds in biochemical, selectivity, and cellular assays that culminated in the discovery of **4** and other highly potent (IC<sub>50</sub> values: ~10–36 nM), selective, and cell-active allosteric inhibitors of PRMT3 (compounds **29**, **30**, **36**, and **37**). In addition, we generated compounds that are very close analogs of these potent inhibitors, but displayed drastically reduced potency as negative controls (compounds **49–51**). These inhibitors and negative controls are valuable chemical tools for the biomedical community to further investigate biological functions and disease associations of PRMT3.

The following graphic will be used for the TOC:

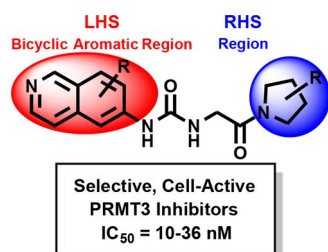

# Discovery of Potent and Selective Allosteric Inhibitors of Protein Arginine Methyltransferase 3 (PRMT3)

H. Ümit Kaniskan,<sup>†,¶</sup> Mohammad S. Eram,<sup>‡,¶</sup> Kehao Zhao,<sup>§</sup> Magdalena M. Szewczyk,<sup>‡</sup> Xiaobao Yang,<sup>†,○</sup> Keith Schmidt,<sup>†</sup> Xiao Luo,<sup>§</sup> Sean Xiao,<sup>§</sup> Miao Dai,<sup>§</sup> Feng He,<sup>§</sup> Irene Zang,<sup>§</sup> Ying Lin,<sup>§</sup> Fengling Li,<sup>‡</sup> Elena Dobrovetsky,<sup>‡</sup> David Smil,<sup>‡</sup> Sun-Joon Min,<sup>†,◆</sup> Jennifer Lin-Jones,<sup>||</sup> Matthieu Schapira,<sup>‡,⊥</sup> Peter Atadja,<sup>§</sup> En Li,<sup>§</sup> Dalia Barsyte-Lovejoy,<sup>‡</sup> Cheryl H. Arrowsmith,<sup>‡,#</sup> Peter J. Brown,<sup>‡</sup> Feng Liu,<sup>\*,∇</sup> Zhengtian Yu,<sup>\*,§</sup> Masoud Vedadi,<sup>\*,‡,⊥</sup> and Jian Jin<sup>\*,†</sup>

<sup>†</sup>Center for Chemical Biology and Drug Discovery, Departments of Pharmacological Sciences and Oncological Sciences, Tisch Cancer Institute, Icahn School of Medicine at Mount Sinai, New York, New York 10029, United States

<sup>‡</sup>Structural Genomics Consortium, University of Toronto, Toronto, ON M5G 1L7, Canada

<sup>§</sup>Novartis Institutes for Biomedical Research (China), Zhangjiang Hi-Tech Park, Pudong New Area, Shanghai 201203, China

<sup>||</sup>DiscoveRx Corporation, Fremont, California 94538, United States

<sup>⊥</sup>Department of Pharmacology and Toxicology, University of Toronto, Toronto, ON M5S 1A8, Canada

<sup>#</sup>Department of Medical Biophysics, University of Toronto and Princess Margaret Cancer Centre, 101 College Street, MaRS South Tower, Suite 707, Toronto, ON M5G 1L7, Canada

<sup>∇</sup>Jiangsu Key Laboratory of Translational Research and Therapy for Neuro-Psycho-Diseases and Department of Medicinal Chemistry, College of Pharmaceutical Sciences, Soochow University, Suzhou, Jiangsu 215123, China

## Supporting Information

**ABSTRACT:** PRMT3 catalyzes the asymmetric dimethylation of arginine residues of various proteins. It is crucial for maturation of ribosomes and has been implicated in several diseases. We recently disclosed a highly potent, selective, and cell-active allosteric inhibitor of PRMT3, compound 4. Here, we report comprehensive structure–activity relationship studies that target the allosteric binding site of PRMT3. We conducted design, synthesis, and evaluation of novel compounds in biochemical, selectivity, and cellular assays that culminated in the discovery of 4 and other highly potent ( $IC_{50}$  values:  $\sim 10$ – $36$  nM), selective, and cell-active allosteric inhibitors of PRMT3 (compounds 29, 30, 36, and 37). In addition, we generated compounds that are very close analogs of these potent inhibitors but displayed drastically reduced potency as negative controls (compounds 49–51). These inhibitors and negative controls are valuable chemical tools for the biomedical community to further investigate biological functions and disease associations of PRMT3.

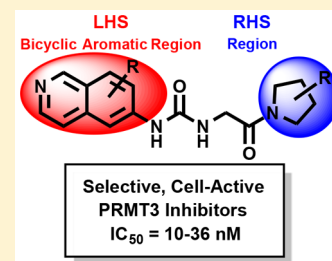

## INTRODUCTION

Protein arginine methyltransferase 3 (PRMT3) is a type I PRMT that catalyzes mono- and asymmetric dimethylation of arginine residues.<sup>1</sup> Ribosomal protein S2 (rpS2) was identified as the major substrate of PRMT3 via its interaction with PRMT3 zinc finger domain in mammalian cells.<sup>2,3</sup> PRMT3 plays a role in ribosome biosynthesis. However, the molecular mechanism by which PRMT3 influences ribosomal biosynthesis remains unclear.<sup>4</sup> Very recently, an extraribosomal complex comprising PRMT3, rpS2, and human programmed cell-death 2-like (PDCD2L) protein was identified.<sup>5</sup> While PRMT3 is localized exclusively in the cytoplasm,<sup>6</sup> it has been shown that in cells treated with palmitic acid or T0901317 (a liver X receptor  $\alpha$  (LXR $\alpha$ ) agonist), PRMT3 colocalizes with LXR $\alpha$  in the cell nucleus, regulating hepatic lipogenesis.<sup>7</sup> However, this effect appears to be independent of the PRMT3 methyltransferase activity. While rpS2 is the primary substrate

of PRMT3, it is not the sole substrate. PRMT3 along with PRMT1 methylates the recombinant mammalian nuclear poly(A)-binding protein (PABPN1) and has been implicated in oculopharyngeal muscular dystrophy, which is caused by polyalanine expansion in PABPN1.<sup>8,9</sup> A protein complex comprising the von Hippel–Lindau (VHL) tumor suppressor protein, PRMT3, and ARF (alternative reading frame) methylates p53.<sup>10</sup> Importantly, the tumor suppressor DAL-1 (differentially expressed in adenocarcinoma of the lung, also known as 4.1B) interacts with PRMT3 and consequently inhibits its methyltransferase activity, suggesting a possible role of PRMT3 regulation in tumor growth.<sup>11</sup> The interaction between DAL-1 and PRMT3 in the induction of apoptosis in MCF-7 cells suggests that this interaction is likely to be an

Received: November 13, 2017

Published: December 15, 2017

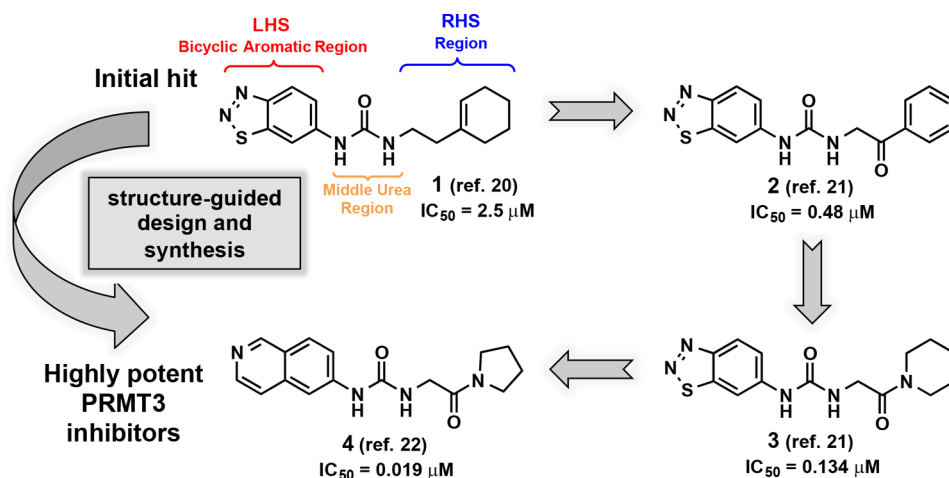

Figure 1. Design and synthesis of highly potent inhibitors of PRMT3.

62 important modulator of the apoptotic pathway and can be  
 63 critical to controlling tumorigenesis in breast cancer cells.<sup>12</sup> It  
 64 has also been shown that PRMT3 methylates a histone peptide  
 65 (H4 1–24) *in vitro*.<sup>13</sup> Modified histone H4R3 is associated  
 66 with increased transcription of a number of genes, including  
 67 those under control of estrogen and androgen receptors.<sup>14–16</sup>  
 68 Furthermore, PRMT3 expression levels are elevated in  
 69 myocardial tissues from patients with atherosclerosis, poten-  
 70 tially implicating the involvement of PRMT3.<sup>17</sup> Additionally,  
 71 PRMT3 function has been reported to be essential for  
 72 dendritic spine maturation in rats.<sup>18</sup> A recent study suggests  
 73 that PRMT3 mediates the preventive effects of irisin against  
 74 lipogenesis and oxidative stress.<sup>19</sup>

75 Our group embarked on research efforts to discover potent,  
 76 selective, and cell-active inhibitors of PRMT3 as chemical tools  
 77 for better understanding of biology and function of this  
 78 understudied protein methyltransferase. We previously re-  
 79 ported the discovery of a novel allosteric binding site of  
 80 PRMT3 and the first selective, allosteric inhibitors of PRMT3  
 81 (compounds 1–3, Figure 1) and subsequently disclosed the  
 82 discovery of SGC707 (4) (Figure 1), a highly potent, selective,  
 83 and cell-active allosteric inhibitor of PRMT3.<sup>20–22</sup> Here, we  
 84 describe the design and synthesis of a large set of novel analogs  
 85 and evaluation of these compounds in biochemical, selectivity,  
 86 and cellular assays. This comprehensive structure–activity  
 87 relationship (SAR) study resulted in the identification of  
 88 multiple highly potent, selective, and cell-active allosteric  
 89 inhibitors of PRMT3 including compound 4.

## 90 ■ RESULTS AND DISCUSSION

91 Our earlier efforts resulted in the identification of selective  
 92 small-molecule inhibitors of PRMT3 (compounds 2 and 3)  
 93 starting from a hit, compound 1 (Figure 1).<sup>20,21</sup> X-ray crystal  
 94 structures of 1 and 2 in complex with PRMT3 were obtained  
 95 and showed that these inhibitors occupied a novel allosteric  
 96 binding site (PDB ID: 3SMQ and 4HSG). These cocrystal  
 97 structures revealed that the left-hand side (LHS) bicyclic  
 98 benzothiadiazole moiety fits tightly in the allosteric pocket and  
 99 the middle nitrogen atom forms a hydrogen bond with T466  
 100 (Figure 2). The urea linker is located at the entrance of the  
 101 cavity and forms hydrogen bonds with the guanidine of R396  
 102 and the carboxylate of E422 (Figure 2). In addition, the right-  
 103 hand side (RHS) moiety extends out of the allosteric binding  
 104 pocket and makes hydrophobic interactions with a surface

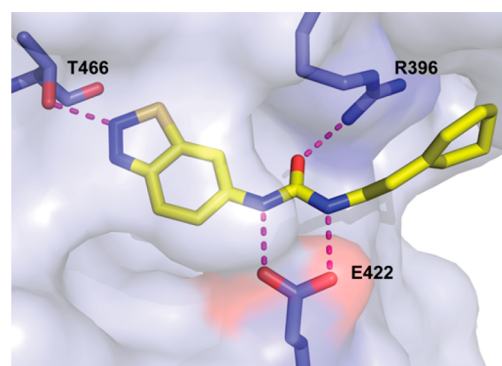

Figure 2. Reported cocrystal structure of compound 1 in complex with PRMT3 indicating key hydrogen bonding interactions (magenta dotted lines) (PDB ID: 3SMQ).<sup>20</sup>

105 composed of the side chains from two different subunits of the  
 106 PRMT3 homodimer. Both structural and SAR data clearly  
 107 indicate that the middle urea region is essential for the affinity,  
 108 and replacement of this group with its bioisosteres and more  
 109 rigid analogs did not yield any inhibitors with improved  
 110 potency.<sup>21</sup> Therefore, in the current study the middle urea  
 111 region of this scaffold was kept unmodified. However, further  
 112 optimization of the RHS moiety led to the discovery of 3  
 113 (Figure 1).<sup>21</sup> Herein, we further optimized both the LHS and  
 114 RHS moieties of this scaffold to achieve improved potency for  
 115 inhibiting PRMT3. First, we conducted a scaffold hopping  
 116 exercise by using the benzothiadiazole ring of 3 as a query for  
 117 the allosteric pocket. A hydrogen-bond constraint was imposed  
 118 in this scaffold hopping study to preserve the important  
 119 hydrogen-bond interaction between the inhibitors and the  
 120 hydroxyl group of T466. As a result of this exercise, 120  
 121 isoquinoline (compound 5), isobenzofuran-1-one (compound  
 122 6), and quinazoline (compound 7) groups were selected for  
 123 experimental validation (Table 1).

124 The RHS of compound 3, piperidineamide, was kept exactly  
 125 the same in these newly synthesized analogs to accurately  
 126 compare the effect of the different LHS bicyclic heteroaromatic  
 127 rings on potency. The isoquinoline containing analog  
 128 (compound 5) with  $IC_{50}$  of  $84 \pm 5$  nM showed a small  
 129 improvement over the parent compound, 3 ( $IC_{50} = 134 \pm 5$   
 130 nM). However, compounds 6 and 7 were around 6-fold less  
 131 potent as compared to 3 (Table 1). Therefore, the isoquinoline

Table 1. Inhibitors with Different LHS Bicyclic Ring Systems

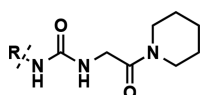

| Compound | Structure (R) | IC <sub>50</sub> (nM) |
|----------|---------------|-----------------------|
| 3        |               | 134 ± 5               |
| 5        |               | 84 ± 5                |
| 6        |               | 757 ± 1               |
| 7        |               | 967 ± 115             |
| 8        |               | >2000                 |

Table 2. Inhibitors with Saturated Aliphatic Groups as the RHS Moiety

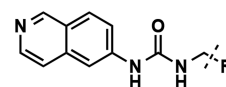

| Compound | Structure (R) | IC <sub>50</sub> (nM) |
|----------|---------------|-----------------------|
| 9        |               | 421 ± 29              |
| 10       |               | 540 ± 54              |
| 11       |               | 295 ± 43              |
| 12       |               | >8000                 |
| 13       |               | 833 ± 66              |
| 14       |               | 291 ± 36              |

bicyclic ring system was taken forward as the LHS moiety for further optimization. Compound **8** (Table 1) was also prepared to confirm the importance of the positioning and hydrogen bonding of the isoquinoline nitrogen with T466. This bicyclic ring is still an isoquinoline but substituted at the 7-position instead of the 6-position (isoquinoline numbering) in effect walking the nitrogen to the adjacent position of compound **5**. As expected, this modification resulted in ablation of inhibitory activity.

As the 6-substituted isoquinoline is an optimal LHS bicycle, we then turned our attention to optimizing the RHS moiety of the scaffold. We first revisited saturated aliphatic groups as the RHS functionality inspired from our initial studies (Table 2).<sup>20,21</sup> Compound **9**, a cyclohexylethyl group containing analog, corresponding to the RHS region of the original hit (compound **1**) was 5-fold less potent than **5**, displaying IC<sub>50</sub> of 421 ± 29 nM. As a logical extension of this compound, we also synthesized the fully saturated, cyclohexylethyl analog (**10**) as well as derivatives containing different ring sizes. Compound **10** (IC<sub>50</sub> = 540 ± 54 nM) was very similar to **9** in potency. The cyclopentane-bearing analog (**11**) showed slight improvement in potency with IC<sub>50</sub> of 295 ± 43 nM, while the cyclopropane-containing analog **12** was virtually inactive (IC<sub>50</sub> > 8000 nM). These results indicated that hydrophobicity of the RHS moiety plays an important role in potency, and cyclohexyl and cyclopentyl rings are preferred compared to the cyclopropyl group. Replacing the cyclohexyl group with a phenyl ring (compound **13**) resulted in a decreased potency (IC<sub>50</sub> = 833 ± 66 nM), underlying the importance of changes to the hydrophobicity of the RHS moiety. On the basis of these results, compound **10** was further investigated to improve the potency. A docking study with this compound hinted that a substituent at the C1 position of the cyclohexyl group would be a favorable position from which E422 might be

possibly reached for further interactions. Therefore, compound **14**, featuring a methyleneamino substituted cyclohexyl group, was synthesized. Interestingly, compound **14** displayed a modest improvement in potency with IC<sub>50</sub> of 291 ± 36 nM, compared to compound **10**. These compounds were synthesized following the previously published synthetic route.<sup>21</sup>

Since no significant improvement in potency was achieved with compounds **9–14** featuring aliphatic groups as the RHS moiety, we decided to keep the amide functionality as in compound **5** and further investigate the substituents on the nitrogen atom (Table 3) as the amide group could form direct or water-mediated contacts with the side chain of K392.<sup>21</sup> We first synthesized new amide derivatives of compound **5**, by replacing the six-membered piperidine ring with the four-membered azetidine ring (compound **15**), five-membered pyrrolidine ring (compound **4**), and seven-membered azepane ring (compound **16**). While the azetidine amide analog **15** displayed only a slight improvement in potency (IC<sub>50</sub> = 61 ± 8 nM), the pyrrolidine amide **4** (IC<sub>50</sub> = 19 ± 1 nM) and azepane amide **16** (IC<sub>50</sub> = 17 ± 2 nM) were ~5-fold more potent than **5** in inhibiting PRMT3. The six-membered ring analogs of **5** such as 4,4-difluoro piperidine amide **17** (IC<sub>50</sub> = 35 ± 1 nM) showed a more than 2-fold improvement over the unsubstituted piperidine amide **5**. However, exchanging the piperidine ring with the 4-methylpiperazine ring (compound **18**), which alters the electronic nature and polarity of the ring system, resulted in the loss of the inhibitory activity. We also designed and synthesized noncyclic di- and monosubstituted amide derivatives (compounds **19–26**). The dimethyl and diethyl amide derivatives **19** and **20** displayed reduced potency with IC<sub>50</sub> of 150 ± 11 and 114 ± 3 nM, respectively. The *N*-cyclopentyl, *N*-methyl amide **21** (IC<sub>50</sub> = 87 ± 5 nM) was as

Table 3. Inhibitors Containing Different RHS Amide Moieties

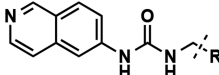

| Compound | Structure (R) | IC <sub>50</sub> (nM) | Compound | Structure (R) | IC <sub>50</sub> (nM) |
|----------|---------------|-----------------------|----------|---------------|-----------------------|
| 5        |               | 84 ± 5                | 20       |               | 114 ± 3               |
| 15       |               | 61 ± 8                | 21       |               | 87 ± 5                |
| 4        |               | 19 ± 1                | 22       |               | 476 ± 34              |
| 16       |               | 17 ± 2                | 23       |               | 1938 ± 95             |
| 17       |               | 35 ± 1                | 24       |               | 158 ± 9               |
| 18       |               | >1900                 | 25       |               | 292 ± 23              |
| 19       |               | 150 ± 11              | 26       |               | 477 ± 5               |

Scheme 1. General Synthetic Route for the Preparation of Compounds Listed in Tables 3 and 4

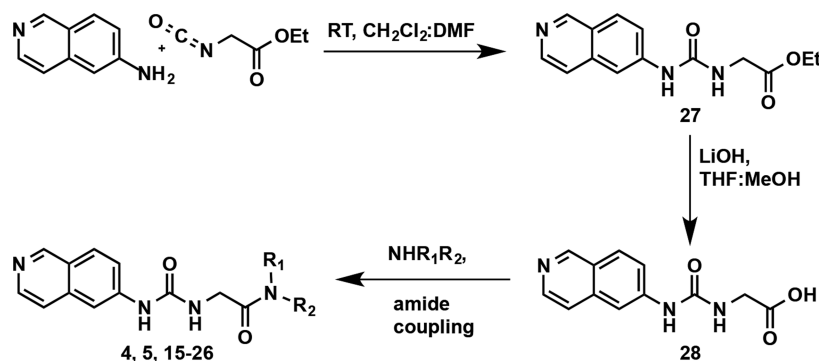

199 potent as compound 5. The Weinreb amide derivative 22,  
 200 however, was around 6-fold less potent than compound 5. The  
 201 monosubstituted amides were also investigated (compounds  
 202 23–26). While *N*-methyl amide 23 displayed significantly  
 203 weaker inhibitory effect, the cyclopropyl (24), cyclopentyl  
 204 (25), and cyclohexyl (26) amide derivatives showed reduced  
 205 potency as the ring size increased. Taken together, these results  
 206 suggest that cyclic amides are preferred RHS moieties, which  
 207 possess balanced steric and hydrophobic properties interacting  
 208 with PRMT3. We, therefore, designated the pyrrolidine amide  
 209 as the RHS moiety for the rest of the SAR study.

210 The compounds in Table 3 were synthesized via the general  
 211 route shown in Scheme 1. The synthesis started with reacting  
 212 commercially available 6-aminoisoquinoline and ethyl iso-  
 213 cyanatoacetate to obtain the desired ethyl ester 27. The  
 214 hydrolysis of the ethyl ester 27 resulted in the carboxylic acid

215 28, which was used as the key intermediate to perform amide  
 216 coupling reactions with various amines to yield the desired  
 217 amide analogs (4, 5, and 15–26). Detailed reaction conditions,  
 218 yields, and characterization data for final compounds are  
 219 reported in the Experimental Section.

220 Next, we focused our attention on analogs of compound 4  
 221 (Table 4), containing substituted pyrrolidine (compounds  
 222 29–31) and fused bicyclic (compounds 32 and 33) and  
 223 bridged bicyclic moieties (compounds 34 and 35). These  
 224 compounds were again prepared according to the synthetic  
 225 route outlined in Scheme 1. The 3,3,4,4-tetrafluoro pyrrolidine  
 226 derivative (compound 29) as well as 2,5-dimethylpyrrolidine  
 227 (a mixture of *cis* and *trans* isomers) (compound 30) analog  
 228 showed very similar potency compared to compound 4.  
 229 However, replacing pyrrolidine with *D*-proline (compound 31)  
 230 resulted in around 9-fold drop in potency. The fused 5,5-

Table 4. Inhibitors with Modified Pyrrolidine Amide Moieties

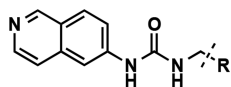

| Compound | Structure (R) | IC <sub>50</sub> (nM) | Compound | Structure (R) | IC <sub>50</sub> (nM) |
|----------|---------------|-----------------------|----------|---------------|-----------------------|
| 4        |               | 19 ± 1                | 32       |               | 55 ± 5                |
| 29       |               | 24 ± 3                | 33       |               | >5000                 |
| 30       |               | 22 ± 2                | 34       |               | 46 ± 5                |
| 31       |               | 166 ± 11              | 35       |               | 22 ± 4                |

Table 5. Inhibitors with Substituted Isoquinolines

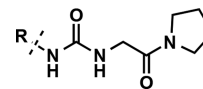

| Compound | Structure (R) | IC <sub>50</sub> (nM) |
|----------|---------------|-----------------------|
| 4        |               | 19 ± 1                |
| 36       |               | 19 ± 4                |
| 37       |               | 36 ± 6                |
| 38       |               | 194 ± 8               |
| 39       |               | 10 ± 1                |
| 40       |               | 19 ± 2                |

231 bicyclic ring system (compound 32) was also tolerated, albeit  
 232 with reduced potency (IC<sub>50</sub> = 55 ± 5 nM). Interestingly, the  
 233 benzene-fused pyrrolidine ring (isoindoline amide, compound  
 234 33) led to a complete loss of the inhibitory effect. Finally, 7-  
 235 azabicyclo[2.2.1]heptane (compound 34) and 8-  
 236 azabicyclo[3.2.1]octane (compound 35), two bridged bicyclic  
 237 pyrrolidine containing moieties, did not result in any  
 238 improvement of potency compared to compound 4, with  
 239 IC<sub>50</sub> of 46 ± 5 and 22 ± 4 nM, respectively. These results  
 240 indicate that small substituents such as fluoro and methyl  
 241 groups on the pyrrolidine ring as well as relatively flexible  
 242 hydrophobic bicyclic ring systems are tolerated.

243 The results summarized in Table 4 and discussed above have  
 244 shown that analogs of 4, namely, compounds 29, 30, 32, 34,  
 245 and 35, potently inhibited PRMT3 with IC<sub>50</sub> values of around  
 246 20–50 nM. Although these analogs did not display improved  
 247 potency compared to compound 4, these substituted  
 248 pyrrolidine groups are valuable alternatives to the unsub-  
 249 stituted pyrrolidine group (compound 4). After completing  
 250 optimization of the RHS moiety, we further investigated the  
 251 LHS isoquinoline ring. Analysis of the crystal structure of  
 252 PRMT3 in complex with compound 4 (PDB ID: 4RYL)<sup>22</sup>  
 253 suggested that there is room in the binding pocket to tolerate a  
 254 relatively small substituent at the 1-, 3-, 7-, and 8-positions of  
 255 the isoquinoline ring system. Our structural analysis also  
 256 suggested that a substituent at the 4- and 5-positions of the  
 257 isoquinoline ring would not be tolerated. Therefore, we  
 258 designed and synthesized the corresponding substituted  
 259 isoquinoline analogs (compounds 36–40) to determine  
 260 whether potency could further be enhanced (Table 5). For  
 261 example, compounds 36 and 37 featuring small 7-fluoro and 7-  
 262 methyl substituents were prepared. Compound 36 showed  
 263 similar potency as 4, while 37, which has a slightly larger  
 264 methyl substituent, was around 2-fold less potent. Compound  
 265 38, however, displayed significant potency loss (about 10-fold),  
 266 indicating that the methyl group at the 1-position of the  
 267 isoquinoline ring is not preferred. Interestingly, the 3-fluoro  
 268 substituted analog 39 displayed almost 2-fold higher potency  
 269 with IC<sub>50</sub> of 10 ± 1 nM. This result suggests that the electronic  
 270 modulation of the isoquinoline ring by a fluoro group does not  
 271 have significant impact on the hydrogen bonding ability of the

272 isoquinoline with T466 and a small substituent such as the  
 273 fluoro group at the 3-position enhances potency, consistent  
 274 with our structural analysis. In addition, we synthesized the 8-  
 275 chloroisoquinoline derivative 40, which exhibited similar  
 276 potency as compound 4. While the result obtained for  
 277 compound 39 was consistent with our prediction based on  
 278 the analysis of the crystal structure of the PRMT3–compound  
 279 4 complex (PDB ID: 4RYL), it was surprising that a small  
 280 substituent such as the fluoro group at the 7-position  
 281 (compound 36) or the chloro group at the 8-position  
 282 (compound 40) did not increase potency and a slightly larger  
 283 substituent such as the methyl group at the 1- and 7-positions  
 284 (compounds 37 and 38) reduced potency. More comprehen-  
 285 sive structural analyses such as molecular dynamics simulation  
 286 are needed to explain the SAR results. Nevertheless, the fluoro  
 287 or chloro substituent could potentially improve metabolic  
 288 stability of these compounds (36, 39, and 40), which are  
 289 interesting alternative PRMT3 inhibitors to compound 4.  
 290 Overall, these results have demonstrated that a small  
 291 substituent at the isoquinoline ring can be tolerated but has  
 292 limited impact on enhancing potency.

293 The substituted 6-amino isoquinoline derivatives used for  
 294 the synthesis of compounds 36–40 (Table 5) were not  
 295 commercially available. Therefore, we devised synthetic routes  
 296 and prepared these substituted 6-amino isoquinolines as shown  
 297 in Scheme 2. The synthesis of 6-amino-7-fluoroisoquinoline  
 298 (43), 6-amino-7-methylisoquinoline (44), and 6-amino-1-  
 299 methylisoquinoline (45) started with reductive amination  
 300 reactions of amino acetaldehyde dimethyl acetal with the  
 301 corresponding 4-bromo aryl aldehyde or methyl aryl ketone to  
 302 give amino dimethyl acetals 41 (Scheme 2A). The  
 303 intermediates 41 were converted to the sulfonamides 42, via  
 304 tosylation, which were then treated with aluminum chloride to  
 305 yield the desired 6-bromoisoquinolines (43). These sub-  
 306 stituted 6-bromoisoquinolines were then converted to the  
 307 desired 6-aminoisoquinolines (44–46) via aryl amination



Scheme 2. Synthetic Routes for Preparing Intermediates 44–48 for Synthesis of Compounds 36–40

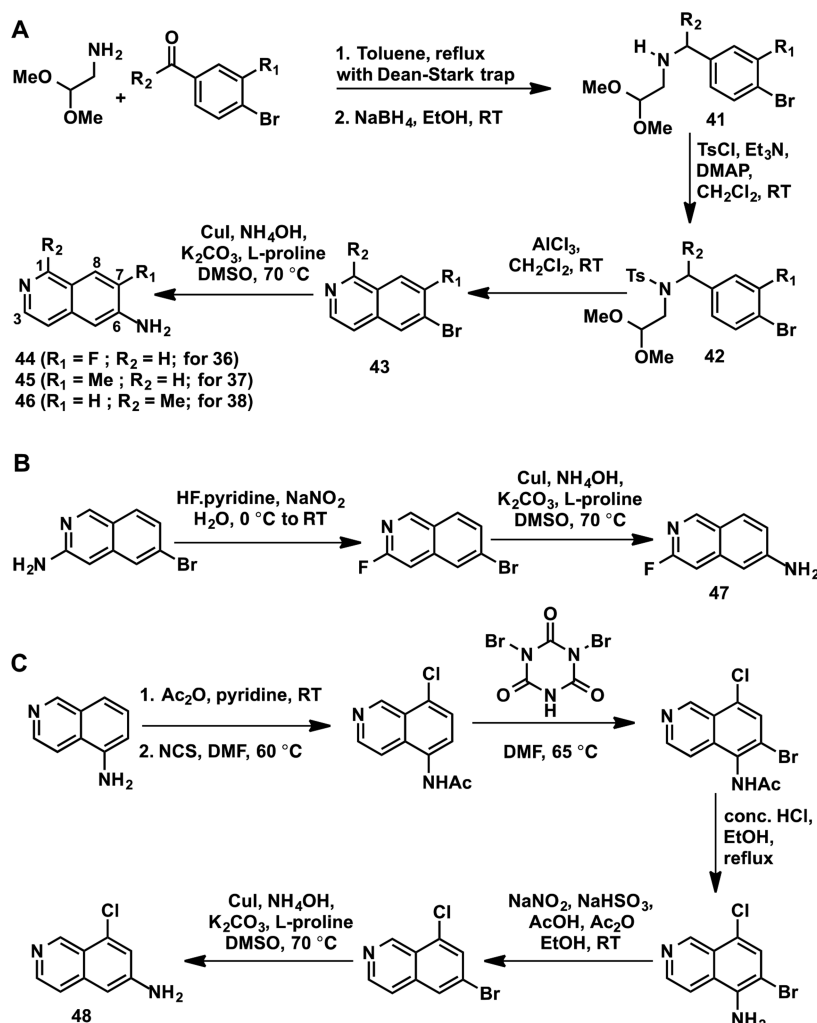

308 reactions (Scheme 2A). The 3-fluoro-6-aminoisoquinoline  
309 (47) was synthesized starting from the commercially available  
310 3-amino-6-bromoisoquinoline in two steps via the Balz–  
311 Schiemann reaction<sup>23,24</sup> followed by an aryl amination  
312 (Scheme 2B). As shown in Scheme 2C, 6-amino-8-  
313 chloroisoquinoline (48) was prepared in six steps. The  
314 commercially available 5-aminoisoquinoline was first acetylated  
315 and then chlorinated to install a chloro group at the 8-position.  
316 Bromination at the 6-position was achieved by using  
317 dibromoisocyanuric acid. Deacetylation followed by reductive  
318 diazotization resulted in 6-amino-8-chloroisoquinoline (48)  
319 (Scheme 2C). Intermediates 44–48 were then used to prepare  
320 compounds 36–40 according to the synthetic route outlined  
321 in Scheme 1.

322 In addition, we designed and synthesized several close  
323 analogs of compound 4 to serve as negative controls for  
324 chemical biology studies. As described earlier, the middle urea  
325 region of these PRMT3 inhibitors forms the key hydrogen-  
326 bonding interactions with E422 of PRMT3. We therefore  
327 predicted that taking either of these hydrogen-bonding  
328 interactions away by methylating either nitrogen atom of the  
329 urea would drastically decrease PRMT3 inhibition. Indeed, as  
330 shown in Table 6, compound 49 displayed markedly  
331 diminished inhibitory activity (IC<sub>50</sub> = 2594 ± 129 nM),  
332 while compound 50 was completely inactive (IC<sub>50</sub> > 50 000

Table 6. Compounds Prepared as Negative Controls

| Compound | Structure | IC <sub>50</sub> (nM) |
|----------|-----------|-----------------------|
| 49       |           | 2594 ± 129            |
| 50       |           | >50000                |
| 51       |           | No Inhibition         |

nM). Furthermore, the nitrogen atom in the isoquinoline ring  
333 of compound 4 forms a key hydrogen bond with T466 of  
334 PRMT3 in the crystal structure of the PRMT3–compound 4  
335 complex (PDB ID: 4RYL). Thus, we replaced the isoquinoline  
336 ring of 4 with the naphthalene ring (compound 51 (XY1)),  
337 effectively removing the critical hydrogen bond with T466. As  
338 we reported previously,<sup>22</sup> compound 51 displayed no  
339 inhibition of the PRMT3 catalytic activity in biochemical  
340 assays.

36

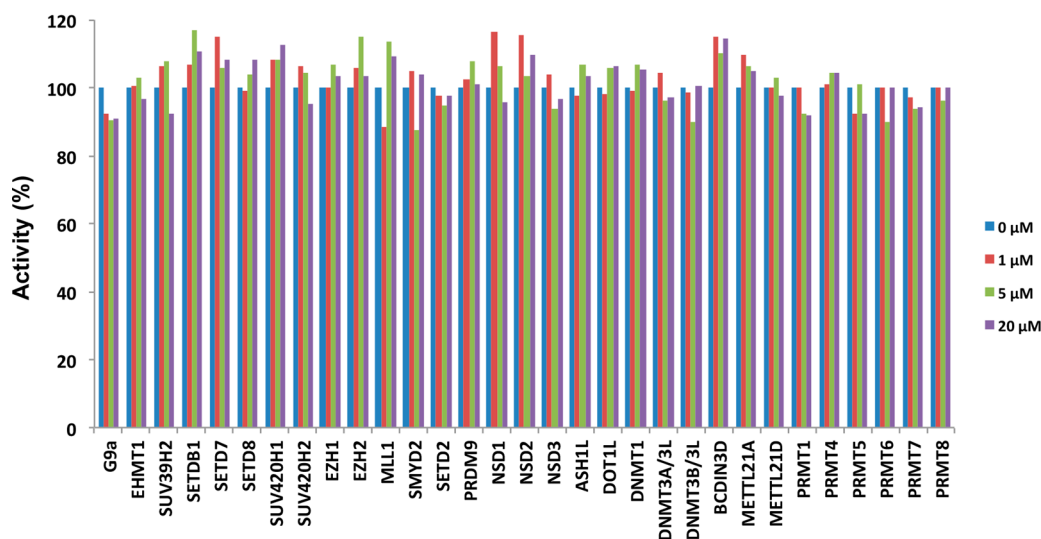

**Figure 3.** Inhibitor 36 is highly selective for PRMT3 over 31 other methyltransferases. The selectivity data for compounds 29 and 30 are shown in the Supporting Information.

342 We previously reported that compound 4 was more than  
 343 200-fold selective for PRMT3 over 31 other methyltransferases  
 344 and more than 250 kinases, GPCRs, ion channels, and  
 345 transporters.<sup>22</sup> Similarly, inhibitors 29, 30, and 36 were  
 346 selective for PRMT3 over 31 other lysine methyltransferases,  
 347 arginine methyltransferases, and DNA and RNA methyltrans-  
 348 ferases (Figure 3 and Supporting Information). In addition, 29,  
 349 30, and 36 were tested in a CEREP selectivity panel consisting  
 350 of 55 protein targets (47 GPCRs, five ion channels, and three  
 351 transporters) and did not show any significant off-target  
 352 activities (% of inhibition <50% at 10  $\mu$ M). It is of note that  
 353 the cocrystal structure of compound 4 in complex with  
 354 PRMT3 reported recently (PDB ID: 4RYL)<sup>22</sup> clearly shows  
 355 that this inhibitor binds the same allosteric pocket as earlier  
 356 inhibitors (compounds 1 and 2 (PDB ID: 3SMQ and 4HSG)).  
 357 To establish the target engagement of PRMT3 inhibitors in  
 358 cells (namely, inhibitors 4, 29, 36, and 37), we used an  
 359 InCELL Hunter Assay, which measures intracellular binding of  
 360 inhibitors to the methyltransferase domain of PRMT3 in cell  
 361 lines expressing the methyltransferase domain of PRMT3  
 362 tagged with a short fragment of  $\beta$ -galactosidase (ePL). Binding  
 363 of a compound to ePL-PRMT3 increases the fusion protein  
 364 half-life. Inhibitors 4, 29, 36, and 37 stabilized PRMT3 in  
 365 A549 cells, a human lung carcinoma cell line, with  $EC_{50}$  values  
 366 of 2.0, 2.7, 1.6, and 4.9  $\mu$ M, respectively (Figure 4, top). The  
 367 same assay was performed in HEK293 cells and these  
 368 compounds displayed  $EC_{50}$  values of 1.8, 3.1, 2.7, and 5.2  
 369  $\mu$ M, respectively (Figure 4, bottom). Compound 51 was used  
 370 as a negative control in these assays. As expected, no  
 371 stabilization was observed with this compound.

372 Furthermore, to establish whether these PRMT3 inhibitors  
 373 can inhibit the PRMT3 catalytic activity in cells, we examined  
 374 their effects on H4R3 asymmetric dimethylation. Since  
 375 methylated arginine residues have relatively slow turnover,  
 376 we overexpressed human Flag-tagged PRMT3 and followed  
 377 the methylation of both endogenous H4 and exogenously  
 378 introduced GFP-tagged H4. As we previously reported,  
 379 overexpressed PRMT3 increased the endogenous H4R3me2a  
 380 from the baseline levels, and compound 4 effectively inhibited  
 381 this increase with an  $IC_{50}$  of 225 nM.<sup>22</sup> The asymmetric

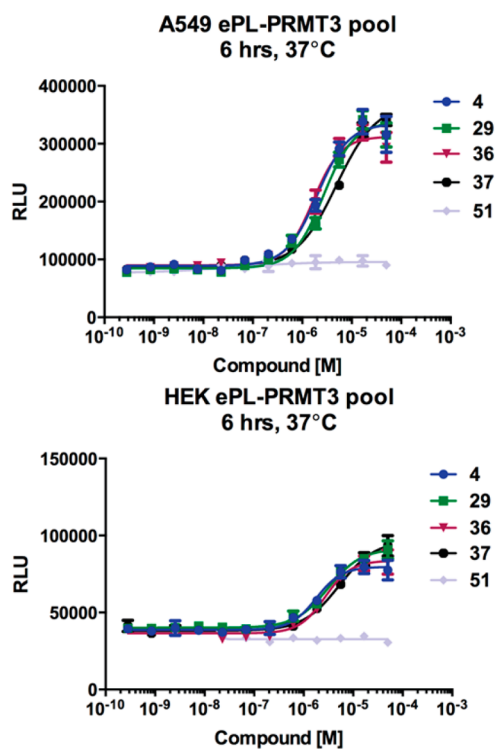

**Figure 4.** InCELL Hunter Assay results of compounds 4, 29, 36, 37, and 51 in A549 and HEK cells.

dimethylation of exogenous H4R3 was also inhibited by 382  
 compound 4 ( $IC_{50}$  = 91 nM), indicating that this inhibitor has 383  
 robust cellular effect.<sup>22</sup> Similarly, as shown in Figure 5, 384  
 compounds 29, 30, and 36 inhibited the exogenous 385  
 asymmetric dimethylation of H4R3 ( $IC_{50}$  = 240, 184, and 386  
 134 nM, respectively). The dependency on the transfected 387  
 PRMT3 catalytic activity was determined by using the 388  
 catalytically dead PRMT3 mutant (E335Q) that did not affect 389  
 endogenous or exogenous H4R3me2a levels and therefore was 390  
 used to establish the baseline levels of the mark. It is of note 391

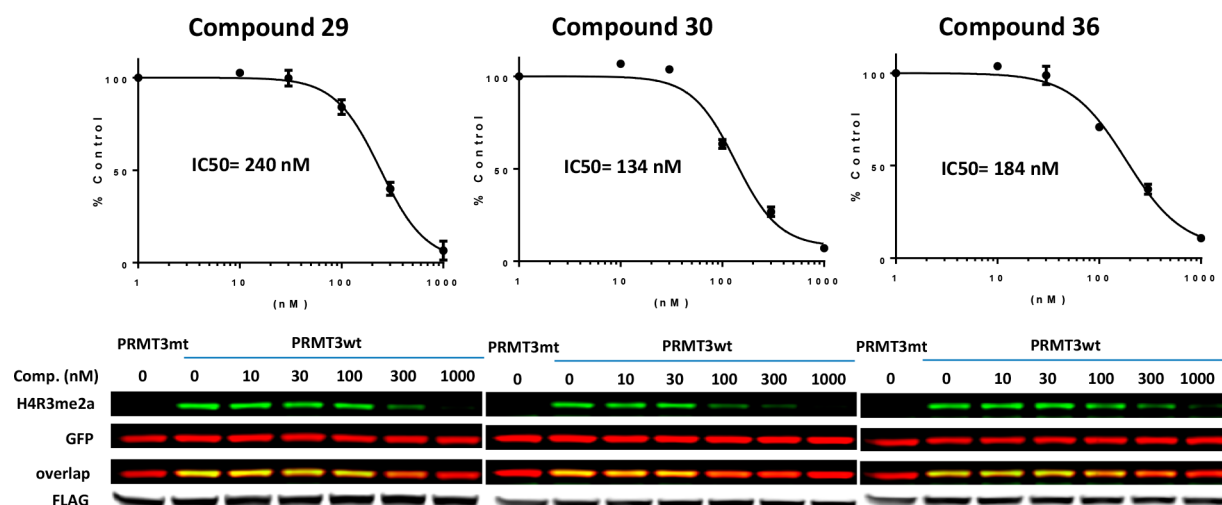

**Figure 5.** Cellular inhibitory activity of compounds 29, 30, and 36. HEK293 cells were cotransfected with FLAG tagged PRMT3 (wt) or its catalytic mutant (mt) and GFP-tagged histone H4 and treated with different concentrations of compounds, as indicated. Total cell lysates were collected 24 h post inhibitor treatment and analyzed for H4R3me2a, GFP, and FLAG levels by Western blotting. The graphs represent nonlinear fits of H4R3me2a fluorescence intensities normalized to GFP. The results are the averages of three replicates.

392 that effects of 1  $\mu\text{M}$  compounds 29, 30, and 36 matched with  
393 that of the catalytically dead PRMT3 mutant E335Q.

## 394 ■ CONCLUSION

395 In summary, we conducted comprehensive SAR studies,  
396 starting from early inhibitors 1–3 and culminating in the  
397 discovery of highly potent ( $\text{IC}_{50}$  values =  $\sim 10$ –36 nM),  
398 selective, and cell-active allosteric inhibitors of PRMT3  
399 (inhibitors 4, 29, 30, 36, and 37). In addition, we generated  
400 compounds that are very close analogs of these potent  
401 inhibitors but that displayed drastically diminished potency  
402 as negative controls (compounds 49–51). The new inhibitors  
403 (compounds 29, 30, and 36) were highly selective for PRMT3  
404 over 31 other methyltransferases and 55 other protein targets.  
405 In cell-based assays, compounds 29, 30, and 36 engaged  
406 PRMT3 and potently inhibited its methyltransferase activity  
407 (Figures 4 and 5). These inhibitors and negative controls are  
408 excellent chemical tools for the biomedical community to  
409 further investigate biological functions and disease associations  
410 of PRMT3.

## 411 ■ EXPERIMENTAL SECTION

412 **Chemistry General Procedures.** Analytical thin-layer chroma-  
413 tography (TLC) was performed employing EMD Milipore 210–270  
414  $\mu\text{m}$  60-F254 silica gel plates. The plates were visualized by exposure  
415 to UV light. Flash column chromatography was performed on a  
416 Teledyne ISCO CombiFlash Rf<sup>+</sup> system equipped with a variable  
417 wavelength UV detector and a fraction collector using RediSep Rf  
418 normal phase silica columns. Nuclear magnetic resonance (NMR)  
419 spectra were acquired on a Bruker DRX-600 spectrometer or on a  
420 Varian Mercury spectrometer at 400 MHz. Chemical shifts are  
421 reported in parts per million (ppm,  $\delta$ ) scale relative to solvent residual  
422 peak (chloroform-*d*:  $^1\text{H}$ , 7.26 ppm;  $^{13}\text{C}$ , 77.16 ppm; methanol-*d*<sub>4</sub>:  $^1\text{H}$ ,  
423 3.31 ppm;  $^{13}\text{C}$ , 49.0 ppm).  $^1\text{H}$  NMR data are reported as follows:  
424 chemical shift, multiplicity (s = singlet, d = doublet, t = triplet, q =  
425 quartet, p = pentet, m = multiplet, app = apparent), coupling  
426 constant, and integration. HPLC spectra for all compounds were  
427 acquired using an Agilent 6110 series system with a UV detector set  
428 to 254 nm. Samples were injected (5  $\mu\text{L}$ ) onto an Agilent Eclipse  
429 Plus, 4.6  $\text{\AA}$ ,  $\sim 50$  mm, 1.8  $\mu\text{m}$ , C18 column at room temperature,  
430 either with a linear gradient from 50% to 100% B (MeOH + 0.1%  
431 acetic acid) in 5.0 min followed by pumping 100% B for another 2

min with A being  $\text{H}_2\text{O}$  + 0.1% acetic acid, or by a linear gradient from 432  
10% to 100% B (MeOH + 0.1% acetic acid) in 5.0 min followed by 433  
pumping 100% B for another 2 min with A being  $\text{H}_2\text{O}$  + 0.1% acetic 434  
acid. The flow rate was 1.0 mL/min. Mass spectrometry (MS) data 435  
were acquired in positive ion mode using an Agilent 6110 single- 436  
quadrupole mass spectrometer with an electrospray ionization (ESI) 437  
source. HRMS analysis was conducted on an Agilent Technologies 438  
G1969A high-resolution API-TOF mass spectrometer attached to an 439  
Agilent Technologies 1200 HPLC system. Samples were ionized by 440  
ESI in positive mode. All biologically evaluated compounds had >95% 441  
purity using the HPLC methods described above. 442

1-(Benzo[d][1,2,3]thiadiazol-6-yl)-3-(2-oxo-2-(piperidin-1-yl)- 443  
ethyl)urea (3). Compound 3 was prepared according to previously 444  
published procedures.<sup>21</sup> 445

1-(Isoquinolin-6-yl)-3-(2-oxo-2-(pyrrolidin-1-yl)ethyl)urea (4). 446  
Compound 4 was prepared according to previously published 447  
procedures.<sup>22</sup> 448

1-(Isoquinolin-6-yl)-3-(2-oxo-2-(piperidin-1-yl)ethyl)urea (5). To 449  
a solution of isoquinolin-6-amine (50 mg, 0.347 mmol) in *N,N*- 450  
dimethylformamide (DMF) (1.6 mL) at room temperature was added 451  
*N,N'*-carbonyldiimidazole (CDI) (84 mg, 0.520 mmol). The resulting 452  
solution was stirred for 12 h prior to the addition of 2-amino-1- 453  
(piperidin-1-yl)ethan-1-one (99 mg, 0.694 mmol) and stirred for a 454  
further 6 h. Following dilution with water (20 mL), the aqueous layer 455  
was extracted with ethyl acetate (EtOAc) ( $3 \times 20$  mL), and the 456  
combined organic extracts were dried with anhydrous sodium sulfate. 457  
After filtration, all solvents were removed under reduced pressure, and 458  
the residue was purified by column chromatography on silica gel to 459  
afford title compound (5) (31 mg, 29% yield).  $^1\text{H}$  NMR (500 MHz, 460  
DMSO-*d*<sub>6</sub>)  $\delta$  9.08 (s, 1H), 8.35 (d,  $J$  = 5.7 Hz, 1H), 8.08 (br s, 1H), 461  
7.98 (d,  $J$  = 8.9 Hz, 1H), 7.63 (d,  $J$  = 5.8 Hz, 1H), 7.02 (br s, 2H), 462  
6.57 (t,  $J$  = 4.6 Hz, 1H), 4.02 (d,  $J$  = 4.7 Hz, 2H), 3.50–3.44 (m, 2H), 463  
3.38–3.33 (m, 2H), 1.65–1.57 (m, 2H), 1.57–1.50 (m, 2H), 1.50– 464  
1.40 (m, 2H).  $m/z$  (HRMS) [ $M + \text{H}$ ]<sup>+</sup> for  $\text{C}_{17}\text{H}_{21}\text{N}_4\text{O}_2$ : calculated 465  
313.1659, found 313.1662. 466

1-(1-Oxo-1,3-dihydroisobenzofuran-5-yl)-3-(2-oxo-2-(piperidin- 467  
1-yl)ethyl)urea (6). To a solution of 5-amino-3H-benzofuran-1-one 468  
(75 mg, 0.5 mmol, 1.0 equiv) in DMF (1.5 mL) was added CDI (90 469  
mg, 0.55 mmol, 1.1 equiv), and the resulting mixture was stirred for 8 470  
h at rt. 2-Amino-1-piperidin-1-ylethanone hydrochloride salt (134 mg, 471  
0.75 mmol, 1.5 equiv) was then added followed by Hunig's base (131 472  
 $\mu\text{L}$ , 0.75 mmol, 1.5 equiv). After being stirred for 18 h at rt, the 473  
resulting mixture was diluted with water (25 mL) and extracted with 474  
EtOAc ( $3 \times 25$  mL). Combined organic layers were dried over 475  
sodium sulfate and concentrated under reduced pressure to give crude 476

477 product, which was then purified by flash column chromatography to  
478 yield desired compound as white solid (39 mg, 25%). <sup>1</sup>H NMR (600  
479 MHz, methanol-*d*<sub>4</sub>) δ 7.85 (s, 1H), 7.73 (d, *J* = 8.5 Hz, 1H), 7.42 (dd,  
480 *J* = 8.5, 1.8 Hz, 1H), 5.31 (s, 2H), 4.10 (s, 2H), 3.57 (t, *J* = 5.6 Hz,  
481 2H), 3.45 (t, *J* = 5.5 Hz, 2H), 1.74–1.50 (m, 6H). MS (ESI) *m/z* [*M*  
482 + *H*]<sup>+</sup> for C<sub>16</sub>H<sub>20</sub>N<sub>3</sub>O<sub>4</sub><sup>+</sup>: calculated 318.1, found 318.1.

483 **1-(2-Oxo-2-(piperidin-1-yl)ethyl)-3-(quinazolin-7-yl)urea (7)**. To  
484 a solution of quinazolin-7-amine (73 mg, 0.5 mmol, 1.0 equiv) in  
485 DMF (1.5 mL) was added CDI (90 mg, 0.55 mmol, 1.1 equiv), and  
486 the resulting mixture was stirred for 8 h at rt. 2-Amino-1-piperidin-1-  
487 ylethanone hydrochloride salt (134 mg, 0.75 mmol, 1.5 equiv) was  
488 then added followed by Hunig's base (131 μL, 0.75 mmol, 1.5 equiv).  
489 After being stirred for 18 h at rt, the resulting mixture was diluted with  
490 water (25 mL) and extracted with EtOAc (3 × 25 mL). Combined  
491 organic layers were dried over sodium sulfate and concentrated under  
492 reduced pressure to give crude product, which was then purified by  
493 flash column chromatography to yield desired compound (10 mg,  
494 6%). <sup>1</sup>H NMR (600 MHz, methanol-*d*<sub>4</sub>) δ 9.29 (s, 1H), 9.06 (s, 1H),  
495 8.22 (d, *J* = 2.1 Hz, 1H), 8.00 (d, *J* = 8.9 Hz, 1H), 7.71 (dd, *J* = 8.9,  
496 2.1 Hz, 1H), 4.14 (s, 2H), 3.58 (t, *J* = 5.6 Hz, 2H), 3.47 (t, *J* = 5.5 Hz,  
497 2H), 1.75–1.53 (m, 6H). MS (ESI) *m/z* [*M* + *H*]<sup>+</sup> for C<sub>16</sub>H<sub>20</sub>N<sub>5</sub>O<sub>2</sub><sup>+</sup>:  
498 calculated 314.2, found 314.2.

499 **1-(Isoquinolin-7-yl)-3-(2-oxo-2-(piperidin-1-yl)ethyl)urea (8)**. To  
500 a solution of isoquinolin-7-amine (50 mg, 0.347 mmol) in DMF (1.6  
501 mL) at room temperature was added CDI (84 mg, 0.520 mmol). The  
502 resulting solution was stirred for 12 h prior to the addition of 2-  
503 amino-1-(piperidin-1-yl)ethan-1-one (99 mg, 0.694 mmol) and  
504 stirred for a further 6 h. Following dilution with water (20 mL),  
505 the aqueous layer was extracted with EtOAc (3 × 20 mL), and the  
506 combined organic extracts were dried with anhydrous sodium sulfate.  
507 After filtration, all solvents were removed under reduced pressure, and  
508 the residue was purified by column chromatography on silica gel to  
509 afford title compound (8) (45 mg, 42% yield). <sup>1</sup>H NMR (500 MHz,  
510 DMSO-*d*<sub>6</sub>) δ 9.13 (s, 1H), 8.33 (d, *J* = 5.6 Hz, 1H), 8.22 (d, *J* = 1.9  
511 Hz, 1H), 7.85 (d, *J* = 8.9 Hz, 1H), 7.69 (d, *J* = 5.6 Hz, 1H), 7.11 (br s,  
512 1H), 6.92 (br s, 1H), 6.50 (t, *J* = 4.7 Hz, 1H), 4.03 (dd, *J* = 14.2, 5.9  
513 Hz, 2H), 3.47–3.44 (m, 2H), 3.38–3.34 (m, 2H), 1.63–1.56 (m,  
514 2H), 1.56–1.50 (m, 2H), 1.49–1.41 (m, 2H). *m/z* (HRMS) [*M* +  
515 *H*]<sup>+</sup> for C<sub>17</sub>H<sub>21</sub>N<sub>4</sub>O<sub>2</sub><sup>+</sup>: calculated 313.1659, found 313.1664.

516 **General Procedures for the Preparation of Compounds 9–**  
517 **14 in Table 2.** Compounds 9–14 shown in Table 2 were prepared  
518 according general procedures described below. To a solution of  
519 isoquinolin-6-amine (1.0 equiv) and triethylamine (TEA) (2 equiv) in  
520 DMF (1 mL/0.347 mmol) was added CDI (1.5 equiv), and the  
521 reaction mixture was allowed to stir at 25 °C for 4 h. To the reaction  
522 mixture was then added the corresponding amine (2 equiv), and the  
523 mixture was allowed to stir for additional 1 h. Then 50 mL of water  
524 and 50 mL of EtOAc were added to the reaction mixture. After  
525 extraction, the organic layer was washed with brine, dried over  
526 anhydrous Na<sub>2</sub>SO<sub>4</sub>, filtered, and concentrated in vacuo. The residue  
527 was purified by column chromatography on silica gel eluting with 0–  
528 5% MeOH in DCM to give the product.

529 **1-(2-(Cyclohex-1-en-1-yl)ethyl)-3-(isoquinolin-6-yl)urea (9)**. Yel-  
530 low oil (67 mg, 62% yield). <sup>1</sup>H NMR (chloroform-*d*) δ: 9.07 (s, 1H),  
531 8.40 (d, *J* = 5.8 Hz, 1H), 8.04 (s, 1H), 7.81 (d, *J* = 8.8 Hz, 1H), 7.66  
532 (s, 1H), 7.53 (d, *J* = 5.8 Hz, 1H), 7.44 (dd, *J* = 8.8, 2.0 Hz, 1H), 7.27  
533 (s, 1H), 5.45 (s, 1H), 5.27–5.30 (m, 1H), 3.42–3.77 (m, 2H), 2.20–  
534 2.17 (m, 6H), 1.97–1.92 (m, 4H), 1.627–1.47 (m, 4H). MS (ESI)  
535 *m/z* [*M* + *H*]<sup>+</sup> for C<sub>18</sub>H<sub>22</sub>N<sub>3</sub>O<sup>+</sup>: calculated 296.2, found 296.1.

536 **1-(2-Cyclohexylethyl)-3-(isoquinolin-6-yl)urea (10)**. Yellow oil  
537 (69 mg, 64% yield). <sup>1</sup>H NMR (DMSO-*d*<sub>6</sub>) δ: 9.07 (s, 1H), 8.87 (s,  
538 1H), 8.33 (d, *J* = 5.8 Hz, 1H), 8.06 (d, *J* = 1.8 Hz, 1H), 7.95 (d, *J* =  
539 9.0 Hz, 1H), 7.60 (d, *J* = 6.0 Hz, 1H), 7.52 (dd, *J* = 8.8, 2.0 Hz, 1H),  
540 6.28 (br t, *J* = 5.5 Hz, 1H), 3.11–3.24 (m, 2H), 1.58–1.76 (m, 5H),  
541 1.11–1.39 (m, 6H), 0.83–0.98 (m, 2H). MS (ESI) *m/z* [*M* + *H*]<sup>+</sup> for  
542 C<sub>18</sub>H<sub>24</sub>N<sub>3</sub>O<sup>+</sup>: calculated 298.2, found 298.1.

543 **1-(2-Cyclopentylethyl)-3-(isoquinolin-6-yl)urea (11)**. Light yellow  
544 oil (30 mg, 29% yield). <sup>1</sup>H NMR (chloroform-*d*) δ: 9.04 (s, 1H), 8.36  
545 (d, *J* = 5.8 Hz, 1H), 8.03 (s, 2H), 7.76 (d, *J* = 8.8 Hz, 1H), 7.34–7.56  
546 (m, 2H), 7.27 (s, 1H), 3.19–3.40 (m, 2H), 1.64–1.82 (m, 3H),

1.40–1.64 (m, 6H), 0.95–1.16 (m, 2H), 0.01 (s, 1H). MS (ESI) *m/z* 547  
[*M* + *H*]<sup>+</sup> for C<sub>17</sub>H<sub>22</sub>N<sub>3</sub>O<sup>+</sup>: calculated 284.2, found 284.1. 548

549 **1-(2-Cyclopropylethyl)-3-(isoquinolin-6-yl)urea (12)**. White solid  
550 (27 mg, 29% yield). <sup>1</sup>H NMR (DMSO-*d*<sub>6</sub>) δ: 9.59 (s, 1H), 9.46 (s, 550  
1H), 8.34–8.51 (m, 2H), 8.28 (d, *J* = 9.0 Hz, 1H), 8.12 (d, *J* = 6.5 551  
Hz, 1H), 7.77 (dd, *J* = 9.0, 2.0 Hz, 1H), 6.71 (br t, *J* = 5.4 Hz, 1H), 552  
3.11–3.27 (m, 3H), 1.38 (q, *J* = 7.0 Hz, 2H), 0.61–0.80 (m, 1H), 553  
0.35–0.49 (m, 2H). MS (ESI) *m/z* [*M* + *H*]<sup>+</sup> for C<sub>15</sub>H<sub>18</sub>N<sub>3</sub>O<sup>+</sup>: 554  
calculated 256.1, found 256.1. 555

556 **1-(Isoquinolin-6-yl)-3-phenethylurea (13)**. Light yellow oil (23 556  
mg, 22% yield). <sup>1</sup>H NMR (chloroform-*d*) δ: 8.95 (s, 1H), 7.89–8.47 557  
(m, 3H), 7.74 (d, *J* = 8.8 Hz, 1H), 7.46 (d, *J* = 5.8 Hz, 1H), 7.37 (dd, 558  
*J* = 8.9, 1.9 Hz, 1H), 7.20–7.30 (m, 2H), 7.09–7.20 (m, 3H), 5.63 559  
(br s, 1H), 3.55 (q, *J* = 6.8 Hz, 2H), 2.84 (t, *J* = 6.9 Hz, 2H). MS 560  
(ESI) *m/z* [*M* + *H*]<sup>+</sup> for C<sub>18</sub>H<sub>18</sub>N<sub>3</sub>O<sup>+</sup>: calculated 292.1, found 292.1. 561

562 **1-(2-(1-(Aminomethyl)cyclohexyl)ethyl)-3-(isoquinolin-6-yl)urea 562**  
(14). The general procedure was applied using *tert*-butyl ((1-(2- 563  
aminoethyl)cyclohexyl)methyl)carbamate as the amine (285 mg, 1.11 564  
mmol) to give *tert*-butyl ((1-(2-(3-(isoquinolin-6-yl)ureido)ethyl)- 565  
cyclohexyl)methyl)carbamate as a white solid. To the solution of *tert*- 566  
butyl ((1-(2-(3-(isoquinolin-6-yl)ureido)ethyl)cyclohexyl)methyl)- 567  
carbamate (130 mg, 0.305 mmol) in DCM (1 mL) was added TFA 568  
(1.000 mL, 12.98 mmol). Then the reaction mixture was stirred at 25 569  
°C for 0.5 h. To the mixture was added 5 mL of toluene, and it was 570  
then concentrated in vacuo. The residue was purified by preparative- 571  
HPLC to give the product as white solid (23 mg, 22% yield). <sup>1</sup>H 572  
NMR (methanol-*d*<sub>4</sub>) δ 8.94–9.07 (m, 1H), 8.28 (br d, *J* = 5.8 Hz, 573  
1H), 8.07 (br s, 1H), 7.88–7.99 (m, 1H), 7.49–7.69 (m, 2H), 3.26– 574  
3.44 (m, 2H), 3.02–3.26 (m, 2H), 2.65 (s, 2H), 1.14–1.78 (m, 13H). 575  
MS (ESI) *m/z* [*M* + *H*]<sup>+</sup> for C<sub>19</sub>H<sub>27</sub>N<sub>4</sub>O<sup>+</sup>: calculated 327.2, found 576  
327.2. 577

578 **General Procedures for the Synthesis of Amides 15–35 in 578**  
**Tables 3 and 4. Synthesis of (Isoquinolin-6-ylcarbamoyl)glycine 579**  
**(28) (Scheme 1).** To a stirring solution of 6-aminoisoquinoline (1.2 g, 580  
8.32 mmol, 1 equiv) in a mixture of dichloromethane and DMF (30 581  
and 10 mL) was added ethyl isocyanatoacetate (2.80 mL, 25 mmol, 582  
3.0 equiv), and the resulting mixture was stirred overnight at room 583  
temperature. After removal of volatiles, the crude mixture was purified 584  
by flash column chromatography (gradient from 100% dichloro- 585  
methane to 10% methanol in dichloromethane) to yield the desired 586  
ethyl ester (27)<sup>22</sup> as a pale yellow solid, which was resuspended in 587  
methanol (48 mL) and water (16 mL) followed by the addition of 1 588  
N solution of NaOH (24 mL). The resulting clear mixture was then 589  
stirred at room temperature overnight. After concentration of the 590  
mixture under reduced pressure, the crude mixture was purified by 591  
reverse phase flash column chromatography (gradient from 100% 592  
water to 10% methanol in dichloromethane) to yield the desired acid 593  
28 as a TFA salt (2.04 g, 57% over two steps). 594

595 To a stirring mixture of the above acid 28 (1.0 equiv) in DMF (0.8 595  
mL/0.1 mmol) was added *N*-(3-(dimethylamino)propyl)-*N'*-ethyl- 596  
carbodiimide hydrochloride (EDC·HCl) (1.5 equiv), 1-hydroxy-7- 597  
azabenzotriazole (HOAt) (1.5 equiv), and the corresponding amine 598  
(1.5 equiv) followed by *N*-methylmorpholine (NMM) (2 equiv), and 599  
the resulting mixture was stirred for 18 h at room temperature. The 600  
reaction was purified by either flash column chromatography or 601  
HPLC to give pure products. 602

603 **1-(2-(Azetidin-1-yl)-2-oxoethyl)-3-(isoquinolin-6-yl)urea (15).** 603  
The reaction mixture was purified by HPLC to give pure product 604  
as a white solid (mono-TFA salt, 8 mg, 10%). <sup>1</sup>H NMR (methanol- 605  
*d*<sub>4</sub>) δ 9.02 (d, *J* = 0.9 Hz, 1H), 8.29 (d, *J* = 5.9 Hz, 1H), 8.08 (d, *J* = 606  
2.1 Hz, 1H), 7.97 (d, *J* = 9.0 Hz, 1H), 7.66–7.61 (m, 1H), 7.57 (dd, *J* 607  
= 8.9, 2.1 Hz, 1H), 4.35–4.27 (m, 2H), 4.07 (t, *J* = 7.8 Hz, 2H), 3.87 608  
(s, 2H), 2.43–2.32 (m, 2H). MS (ESI) *m/z* [*M* + *H*]<sup>+</sup> for 609  
C<sub>15</sub>H<sub>17</sub>N<sub>4</sub>O<sub>2</sub><sup>+</sup>: calculated 285.1, found 285.2. 610

611 **1-(2-(Azepan-1-yl)-2-oxoethyl)-3-(isoquinolin-6-yl)urea (16).** The 611  
title compound was obtained as a white solid (mono-TFA salt, 21 mg, 612  
40%). <sup>1</sup>H NMR (600 MHz, methanol-*d*<sub>4</sub>) δ 9.37 (s, 1H), 8.37 (d, *J* = 613  
2.0 Hz, 1H), 8.31 (d, *J* = 6.6 Hz, 1H), 8.27 (d, *J* = 9.0 Hz, 1H), 8.07 614  
(d, *J* = 6.6 Hz, 1H), 7.81 (dd, *J* = 9.0, 2.0 Hz, 1H), 4.17 (s, 2H), 615  
3.61–3.56 (m, 2H), 3.56–3.51 (m, 2H), 1.86–1.82 (m, 2H), 1.78– 616

617 1.71 (m, 2H), 1.69–1.58 (m, 4H). <sup>13</sup>C NMR (151 MHz, methanol-*d*<sub>4</sub>) δ 170.5, 156.7, 149.3, 146.9, 145.6, 142.1, 133.3, 132.1, 125.4, 619 124.2, 112.4, 48.1, 47.4, 42.5, 29.7, 28.5, 28.3, 27.8. MS (ESI) *m/z* [M + H]<sup>+</sup> for C<sub>18</sub>H<sub>23</sub>N<sub>4</sub>O<sub>2</sub><sup>+</sup>: calculated 327.2, found 327.2.

621 **1-(2-(4,4-Difluoropiperidin-1-yl)-2-oxoethyl)-3-(isoquinolin-6-yl)-urea (17)**. The title compound was obtained as a white solid (mono-TFA salt, 51 mg, 66%). <sup>1</sup>H NMR (400 MHz, methanol-*d*<sub>4</sub>) δ 9.39 (d, 624 *J* = 0.9 Hz, 1H), 8.45 (d, *J* = 2.1 Hz, 1H), 8.37–8.27 (m, 2H), 8.14 (d, *J* = 6.7 Hz, 1H), 7.86 (dd, *J* = 9.1, 2.1 Hz, 1H), 4.21 (s, 2H), 3.75 (t, *J* = 6.1 Hz, 2H), 3.65 (t, *J* = 6.0 Hz, 2H), 2.14–1.96 (m, 4H). <sup>13</sup>C NMR (151 MHz, methanol-*d*<sub>4</sub>) δ 169.5, 156.8, 149.3, 147.0, 145.7, 628 142.1, 132.2, 125.3, 124.3, 122.9, 112.5, 111.2, 42.6, 40.3, 35.1, 34.6. MS (ESI) *m/z* [M + H]<sup>+</sup> for C<sub>17</sub>H<sub>19</sub>F<sub>2</sub>N<sub>4</sub>O<sub>2</sub><sup>+</sup>: calculated 349.2, found 630 349.2.

631 **1-(Isoquinolin-6-yl)-3-(2-(4-methylpiperazin-1-yl)-2-oxoethyl)-urea (18)**. The title compound was obtained as a light yellow solid (bis-TFA salt, 48 mg, 52%). <sup>1</sup>H NMR (400 MHz, DMSO-*d*<sub>6</sub>) δ 9.96 (br s, 1H), 9.47 (s, 1H), 8.44 (d, *J* = 6.5 Hz, 1H), 8.32–8.28 (m, 2H), 635 8.10 (d, *J* = 6.5 Hz, 1H), 7.78 (dd, *J* = 9.0, 2.1 Hz, 1H), 6.90 (br s, 636 1H), 4.12 (br s, 2H), 3.40 (br s, 8H); these protons are obscured by residual water in DMSO, 2.83 (br s, 3H). MS (ESI) *m/z* [M + H]<sup>+</sup> for C<sub>17</sub>H<sub>22</sub>N<sub>5</sub>O<sub>2</sub><sup>+</sup>: calculated 328.2, found 638 328.2.

639 **2-(3-(Isoquinolin-6-yl)ureido)-N,N-dimethylacetamide (19)**. The title compound was obtained as a white solid (mono-TFA salt, 14.6 mg, 18%). <sup>1</sup>H NMR (400 MHz, methanol-*d*<sub>4</sub>) δ 9.03 (s, 1H), 8.29 (d, 642 *J* = 5.9 Hz, 1H), 8.10 (d, *J* = 2.1 Hz, 1H), 7.98 (d, *J* = 8.9 Hz, 1H), 643 7.65 (d, *J* = 5.9 Hz, 1H), 7.59 (dd, *J* = 8.9, 2.1 Hz, 1H), 4.13 (s, 2H), 644 3.08 (s, 3H), 2.99 (s, 3H). MS (ESI) *m/z* [M + H]<sup>+</sup> for C<sub>14</sub>H<sub>17</sub>N<sub>4</sub>O<sub>2</sub><sup>+</sup>: calculated 273.1, found 273.2.

646 **N,N-Diethyl-2-(3-(isoquinolin-6-yl)ureido)acetamide (20)**. The title compound was obtained as a white solid (34.1 mg, 81%). <sup>1</sup>H NMR (400 MHz, methanol-*d*<sub>4</sub>) δ 9.05 (s, 1H), 8.30 (d, *J* = 5.9 Hz, 649 1H), 8.11 (s, 1H), 8.00 (d, *J* = 9.0 Hz, 1H), 7.67 (d, *J* = 6.0 Hz, 1H), 650 7.60 (dd, *J* = 8.9, 2.1 Hz, 1H), 4.14 (s, 2H), 3.42 (apparent p, *J* = 7.0 651 Hz, 4H), 1.27 (t, *J* = 7.2 Hz, 3H), 1.16 (t, *J* = 7.1 Hz, 3H). MS (ESI) 652 *m/z* [M + H]<sup>+</sup> for C<sub>16</sub>H<sub>21</sub>N<sub>4</sub>O<sub>2</sub><sup>+</sup>: calculated 301.2, found 301.2.

653 **N-Cyclopentyl-2-(3-(isoquinolin-6-yl)ureido)-N-methylacetamide (21)**. The title compound was obtained as a white solid (18.2 mg, 40%). <sup>1</sup>H NMR (400 MHz, methanol-*d*<sub>4</sub>) δ 9.03 (s, 1H), 8.29 (d, 656 *J* = 5.9 Hz, 1H), 8.10 (d, *J* = 2.1 Hz, 1H), 7.98 (d, *J* = 8.9 Hz, 1H), 657 7.65 (d, *J* = 5.9 Hz, 1H), 7.59 (dd, *J* = 8.9, 2.1 Hz, 1H), 4.92–4.90 658 (m, 1H), 4.27–4.25 (m, 1H), 4.21 (s, 1H), 4.11 (s, 1H), 2.93 (s, 1H), 659 2.86 (s, 1H), 1.94 (s, 1H), 1.86–1.55 (m, 7H). MS (ESI) *m/z* [M + 660 H]<sup>+</sup> for C<sub>18</sub>H<sub>23</sub>N<sub>4</sub>O<sub>2</sub><sup>+</sup>: calculated 327.2, found 327.2.

661 **2-(3-(Isoquinolin-6-yl)ureido)-N-methoxy-N-methylacetamide (22)**. The title compound was obtained as a white solid (mono-TFA salt, 34.9 mg, 63%). <sup>1</sup>H NMR (400 MHz, methanol-*d*<sub>4</sub>) δ 9.37 (d, *J* = 664 1.1 Hz, 1H), 8.33–8.28 (m, 2H), 8.25 (d, *J* = 9.1 Hz, 1H), 8.05 (d, *J* = 665 = 6.7 Hz, 1H), 7.79 (dd, *J* = 9.1, 2.1 Hz, 1H), 4.24 (s, 2H), 3.82 (s, 666 3H), 3.25 (s, 3H). MS (ESI) *m/z* [M + H]<sup>+</sup> for C<sub>14</sub>H<sub>17</sub>N<sub>4</sub>O<sub>3</sub><sup>+</sup>: calculated 289.1, found 289.1.

668 **2-(3-(Isoquinolin-6-yl)ureido)-N-methylacetamide (23)**. The reaction mixture was then purified by HPLC to give pure product as a white mono-TFA salt (4 mg, 8%). <sup>1</sup>H NMR (400 MHz, methanol-*d*<sub>4</sub>) δ 9.41 (d, *J* = 0.9 Hz, 1H), 8.46 (d, *J* = 2.1 Hz, 1H), 8.36–8.27 (m, 672 2H), 8.16 (d, *J* = 6.7 Hz, 1H), 7.87 (dd, *J* = 9.1, 2.1 Hz, 1H), 3.92 (s, 673 2H), 2.78 (s, 3H). MS (ESI) *m/z* [M + H]<sup>+</sup> for C<sub>13</sub>H<sub>15</sub>N<sub>4</sub>O<sub>2</sub><sup>+</sup>: calculated 259.1, found 259.1.

675 **N-Cyclopropyl-2-(3-(isoquinolin-6-yl)ureido)acetamide (24)**. The title compound was obtained as a white solid (58 mg, 78%). <sup>1</sup>H NMR (400 MHz, DMSO-*d*<sub>6</sub>) δ 9.91 (s, 1H), 9.52 (s, 1H), 8.45 (d, *J* = 6.6 678 Hz, 1H), 8.44–8.28 (m, 2H), 8.18 (d, *J* = 6.6 Hz, 1H), 8.10 (d, *J* = 679 4.1 Hz, 1H), 7.79 (dd, *J* = 9.0, 2.0 Hz, 1H), 6.83 (t, *J* = 5.3 Hz, 1H), 680 3.74 (d, *J* = 5.2 Hz, 2H), 2.69–2.62 (m, 1H), 0.65–0.61 (m, 2H), 681 0.48–0.37 (m, 2H). MS (ESI) *m/z* [M + H]<sup>+</sup> for C<sub>15</sub>H<sub>17</sub>N<sub>4</sub>O<sub>2</sub><sup>+</sup>: calculated 285.1, found 285.1.

683 **N-Cyclopentyl-2-(3-(isoquinolin-6-yl)ureido)acetamide (25)**. The title compound was obtained as a white solid (15 mg, 38%). <sup>1</sup>H NMR (400 MHz, methanol-*d*<sub>4</sub>) δ 9.04 (s, 1H), 8.30 (d, *J* = 5.9 Hz, 1H), 686 8.09 (d, *J* = 2.1 Hz, 1H), 7.99 (d, *J* = 8.9 Hz, 1H), 7.66 (d, *J* = 6.0 Hz,

1H), 7.59 (dd, *J* = 8.9, 2.1 Hz, 1H), 4.15 (p, *J* = 6.7 Hz, 1H), 3.88 (s, 687 2H), 2.00–1.89 (m, 2H), 1.73 (s, 2H), 1.68–1.56 (m, 2H), 1.49 (dq, 688 *J* = 14.4, 8.3, 7.5 Hz, 2H). MS (ESI) *m/z* [M + H]<sup>+</sup> for C<sub>17</sub>H<sub>21</sub>N<sub>4</sub>O<sub>2</sub><sup>+</sup>: calculated 313.2, found 313.2.

**N-Cyclohexyl-2-(3-(isoquinolin-6-yl)ureido)acetamide (26)**. The title compound was obtained as a white solid (mono-TFA salt, 48.3 mg, 53%). <sup>1</sup>H NMR (400 MHz, methanol-*d*<sub>4</sub>) δ 9.40 (s, 1H), 8.45 (d, 693 *J* = 2.1 Hz, 1H), 8.34–8.31 (m, 2H), 8.14 (d, *J* = 6.7 Hz, 1H), 7.86 (dd, *J* = 9.0, 2.1 Hz, 1H), 3.91 (s, 2H), 3.73–3.69 (m, 1H), 1.90–1.87 (m, 2H), 1.78–1.75 (m, 2H), 1.66–1.63 (m, 1H), 1.42–1.19 (m, 5H). MS (ESI) *m/z* [M + H]<sup>+</sup> for C<sub>15</sub>H<sub>23</sub>N<sub>4</sub>O<sub>2</sub><sup>+</sup>: calculated 327.2, found 327.2.

**1-(Isoquinolin-6-yl)-3-(2-oxo-2-(3,3,4,4-tetrafluoropyrrolidin-1-yl)ethyl)urea (29)**. The title compound was obtained as a white solid (48.3 mg, 53%). <sup>1</sup>H NMR (400 MHz, methanol-*d*<sub>4</sub>) δ 9.04 (s, 1H), 8.30 (d, *J* = 5.9 Hz, 1H), 8.11–8.07 (m, 1H), 7.98 (d, *J* = 8.9 Hz, 702 1H), 7.65 (d, *J* = 5.9 Hz, 1H), 7.59 (dd, *J* = 8.9, 2.1 Hz, 1H), 4.28 (t, *J* = 13.5 Hz, 2H), 4.08–4.01 (m, 4H). MS *m/z* (HRMS) [M + H]<sup>+</sup> for C<sub>16</sub>H<sub>15</sub>F<sub>4</sub>N<sub>4</sub>O<sub>2</sub><sup>+</sup>: calculated 371.1126, found 371.1153.

**1-(2-(2,5-Dimethylpyrrolidin-1-yl)-2-oxoethyl)-3-(isoquinolin-6-yl)urea (30)**. The title compound was obtained as a white solid (48.2 mg, 88%). The amine, 2,5-dimethylpyrrolidine, is used as mixture of cis and trans for the coupling reaction, and only the major product is reported below. <sup>1</sup>H NMR (400 MHz, methanol-*d*<sub>4</sub>) δ 9.03 (br s, 1H), 8.29 (d, *J* = 5.9 Hz, 1H), 8.09 (d, *J* = 2.1 Hz, 1H), 7.98 (d, *J* = 8.9 Hz, 711 1H), 7.65 (d, *J* = 5.9 Hz, 1H), 7.59 (dd, *J* = 8.9, 2.2 Hz, 1H), 4.19–4.01 (m, 4H), 2.17–1.97 (m, 2H), 1.79–1.71 (m, 2H), 1.34 (d, *J* = 713 6.4 Hz, 3H), 1.33 (d, *J* = 6.4 Hz, 3H). MS *m/z* (HRMS) [M + H]<sup>+</sup> for C<sub>18</sub>H<sub>23</sub>N<sub>4</sub>O<sub>2</sub><sup>+</sup>: calculated 327.1816, found 371.1819.

**Methyl(isoquinolin-6-ylcarbamoyl)glycyl-L-prolinate (31)**. The title compound was obtained as a yellow solid (mono-TFA salt, 51 mg, 65%). <sup>1</sup>H NMR (400 MHz, methanol-*d*<sub>4</sub>) δ 9.40 (s, 1H), 8.39 (s, 718 1H), 8.32 (br s, 2H), 8.13 (s, 1H), 7.84 (s, 1H), 4.52 (dd, *J* = 8.7, 3.9 719 Hz, 1H), 4.23–4.08 (m, 2H), 3.81 (s, 1H), 3.75–3.57 (m, 4H), 2.32–720 2.23 (m, 1H), 2.14–1.97 (m, 3H). MS (ESI) *m/z* [M + H]<sup>+</sup> for C<sub>18</sub>H<sub>21</sub>N<sub>4</sub>O<sub>4</sub><sup>+</sup>: calculated 357.2, found 357.2. [α]<sub>D</sub><sup>20</sup> = –70 (c 1.6, 722 CH<sub>3</sub>OH).

**1-(2-(Hexahydrocyclopenta[c]pyrrol-2(1H)-yl)-2-oxoethyl)-3-(isoquinolin-6-yl)urea (32)**. The title compound was obtained as a white solid (mono-TFA salt, 33 mg, 44%). <sup>1</sup>H NMR (400 MHz, methanol-*d*<sub>4</sub>) δ 9.41 (s, 1H), 8.46 (s, 1H), 8.33 (d, *J* = 7.4 Hz, 2H), 8.15 (s, 727 1H), 7.87 (d, *J* = 9.1 Hz, 1H), 4.07 (s, 2H), 3.73–3.65 (m, 2H), 728 3.31–3.30 (m, 2H), 2.87–2.79 (m, 1H), 2.75–2.66 (m, 1H), 1.97–729 1.77 (m, 3H), 1.73–1.63 (m, 1H), 1.59–1.46 (m, 2H). MS (ESI) *m/z* [M + H]<sup>+</sup> for C<sub>19</sub>H<sub>23</sub>N<sub>4</sub>O<sub>2</sub><sup>+</sup>: calculated 339.2, found 339.2.

**1-(2-(Isoindolin-2-yl)-2-oxoethyl)-3-(isoquinolin-6-yl)urea (33)**. The title compound was obtained as a white solid (42 mg, 73%). <sup>1</sup>H NMR (400 MHz, methanol-*d*<sub>4</sub>) δ 9.04 (s, 1H), 8.30 (d, *J* = 5.9 Hz, 734 1H), 8.12 (d, *J* = 2.1 Hz, 1H), 7.99 (d, *J* = 8.9 Hz, 1H), 7.63 (d, *J* = 735 5.8 Hz, 1H), 7.56 (dd, *J* = 8.9, 2.1 Hz, 1H), 7.36–7.31 (m, 3H), 6.65 736 (t, *J* = 4.8 Hz, 1H), 4.88 (s, 2H), 4.71 (s, 2H), 4.09 (d, *J* = 4.7 Hz, 737 2H). MS (ESI) *m/z* [M + H]<sup>+</sup> for C<sub>20</sub>H<sub>19</sub>N<sub>4</sub>O<sub>2</sub><sup>+</sup>: calculated 347.2, found 347.2.

**1-(2-(7-Azabicyclo[2.2.1]heptan-7-yl)-2-oxoethyl)-3-(isoquinolin-6-yl)urea (34)**. The title compound was obtained as a white solid (mono-TFA salt, 33 mg, 45%). <sup>1</sup>H NMR (400 MHz, methanol-*d*<sub>4</sub>) δ 9.40 (br s, 1H), 8.43 (d, *J* = 2.1 Hz, 1H), 8.35–8.28 (m, 2H), 8.13 (d, 742 *J* = 6.7 Hz, 1H), 7.85 (dd, *J* = 9.1, 2.1 Hz, 1H), 4.60 (t, *J* = 4.8 Hz, 744 1H), 4.41 (t, *J* = 4.8 Hz, 1H), 4.10 (s, 2H), 1.90 (q, *J* = 9.1, 7.0 Hz, 745 2H), 1.77 (s, 2H), 1.68–1.59 (m, 2H), 1.58–1.50 (m, 2H). MS (ESI) 746 *m/z* [M + H]<sup>+</sup> for C<sub>18</sub>H<sub>21</sub>N<sub>4</sub>O<sub>2</sub><sup>+</sup>: calculated 325.2, found 325.2.

**1-(2-(8-Azabicyclo[3.2.1]octan-8-yl)-2-oxoethyl)-3-(isoquinolin-6-yl)urea (35)**. The title compound was obtained as a white solid (22 mg, 38%). <sup>1</sup>H NMR (400 MHz, methanol-*d*<sub>4</sub>) δ 8.99 (s, 1H), 8.26 (d, 750 *J* = 5.9 Hz, 1H), 8.05 (s, 1H), 7.93 (d, *J* = 9.0 Hz, 1H), 7.62–7.52 (m, 751 2H), 4.62–4.55 (m, 1H), 4.27 (d, *J* = 6.7 Hz, 1H), 4.18–4.02 (m, 752 2H), 2.15–2.03 (m, 1H), 1.97–1.70 (m, 6H), 1.62 (dd, *J* = 13.2, 5.4 753 Hz, 2H), 1.53 (d, *J* = 12.8 Hz, 1H). MS (ESI) *m/z* [M + H]<sup>+</sup> for C<sub>19</sub>H<sub>23</sub>N<sub>4</sub>O<sub>2</sub><sup>+</sup>: calculated 339.2, found 339.2.

756 1-(7-Fluoroisoquinolin-6-yl)-3-(2-oxo-2-(pyrrolidin-1-yl)ethyl)-  
757 urea (36) (Scheme 2A; Table 5). A mixture of aminoacetaldehyde  
758 dimethyl acetal (0.5 g, 2.46 mmol, 1.0 equiv) and 4-bromo-3-  
759 fluorobenzaldehyde (0.4 mL, 3.70 mmol, 1.5 equiv) in toluene (40  
760 mL) in a round-bottom flask equipped with a reflux condenser and  
761 Dean–Stark trap was heated to reflux for 6 h. Then the reaction  
762 mixture was quenched with water (20 mL) and extracted with DCM  
763 (40 mL). After concentration of volatiles, crude mixture was dissolved  
764 in EtOH (20 mL), and NaBH<sub>4</sub> (0.19 g, 4.92 mmol, 2 equiv) was  
765 added at room temperature and stirred overnight. The reaction was  
766 then quenched with water (50 mL) and extracted with EtOAc (50 mL  
767 × 3). Combined organic layers were washed with brine (50 mL × 2)  
768 and dried over Na<sub>2</sub>SO<sub>4</sub> and concentrated under reduced pressure to  
769 give the desired amino acetal (41 (R<sub>1</sub> = F, R<sub>2</sub> = H) in Scheme 2A)  
770 (0.65 g, 90%). The amino acetal (0.35 g, 1.19 mmol) was  
771 resuspended in DCM (20 mL), and TEA (0.5 mL, 3.57 mmol, 3  
772 equiv), TsCl (0.27 g, 1.43 mmol, 1.2 equiv), and DMAP (15 mg, 10  
773 mol %) were added to give a clear solution, which was stirred at room  
774 temperature overnight. The reaction mixture was then suspended in  
775 water (20 mL) and extracted with DCM (50 mL × 3). Combined  
776 organic layers were washed with brine, dried over Na<sub>2</sub>SO<sub>4</sub>, and  
777 concentrated down. The crude mixture was purified by flash column  
778 chromatography to give the desired tosyl amine (0.51 g, 90%) (42 (R<sub>1</sub>  
779 = F, R<sub>2</sub> = H) in Scheme 2A).

780 To a flame-dried flask equipped with Teflon stir bar was added  
781 AlCl<sub>3</sub> (0.27 g, 2.02 mmol, 4.5 equiv) under nitrogen atmosphere  
782 followed by the addition of the above solution of tosyl amine (0.2 g,  
783 0.45 mmol, 1.0 equiv) in DCM (6 mL). The resulting solution was  
784 stirred under nitrogen at room temperature overnight. The reaction  
785 mixture was then cooled down to 0 °C, quenched with NaHCO<sub>3</sub> (10  
786 mL), and extracted with DCM (20 mL × 3). Combined organic layers  
787 were washed with brine (10 mL), dried over Na<sub>2</sub>SO<sub>4</sub>, and  
788 concentrated. The crude oil was then purified by flash column  
789 chromatography to yield desired 6-bromo-7-fluoroisouinoline (58 mg,  
790 58%) (43 (R<sub>1</sub> = F, R<sub>2</sub> = H) in Scheme 2A).

791 To a flame-dried pressure vessel equipped with Teflon stirring bar  
792 was added CuI (10 mg, 0.05 mmol, 20 mol %), L-proline (12 mg, 0.10  
793 mmol, 40 mol %), and K<sub>2</sub>CO<sub>3</sub> (104 mg, 0.75 mmol, 3 equiv) as solid,  
794 and the vessel was flame-dried again under vacuum. Then DMSO (1  
795 mL) solution of 6-bromo-7-fluoroisouinoline (58 mg, 0.25 mmol, 1  
796 equiv) was added to the pressure vessel under nitrogen atmosphere  
797 followed by the addition of NH<sub>4</sub>OH (0.5 mL). The resulting  
798 suspension in a sealed vessel was then heated to 70 °C overnight. The  
799 reaction mixture was then cooled down to rt, suspended in water (5  
800 mL) and EtOAc (10 mL), and further extracted with EtOAc (10 mL  
801 × 3). Combined organic layers were washed with brine (10 mL),  
802 dried over Na<sub>2</sub>SO<sub>4</sub>, and concentrated. The crude oil was then purified  
803 by flash column chromatography to yield desired 7-fluoroisouinoline-  
804 6-amine (44 (R<sub>1</sub> = F, R<sub>2</sub> = H) in Scheme 2A). This amine was then  
805 immediately dissolved in DCM/DMF (1 mL/0.3 mL), and ethyl  
806 isocyanato acetate (96 mg, 0.75 mmol, 3 equiv) was added. The  
807 resulting mixture was stirred at room temperature overnight, and after  
808 removal of volatiles, it was purified by flash column chromatography  
809 and immediately hydrolyzed to acid with 1 N NaOH (1 mL) in  
810 MeOH (1.5 mL) and water (0.5 mL) overnight. After purification by  
811 reverse phase chromatography, the desired acid was obtained as a  
812 white solid. To a stirring mixture of the acid (27 mg, 0.072 mmol) in  
813 THF (1.0 mL) was added pyrrolidine (10 μL, 0.122 mmol, 1.70  
814 equiv) followed by EDC-HCl (23.4 mg, 0.122 mmol, 1.70 equiv), and  
815 the resulting mixture was stirred overnight at room temperature. Flash  
816 column chromatography yielded 1-(7-fluoroisoquinolin-6-yl)-3-(2-  
817 oxo-2-(pyrrolidin-1-yl)ethyl)urea (36) as a white solid (16.2 mg,  
818 20% yield over four steps, starting from 6-bromo-7-fluoroisouinoline  
819 43 (R<sub>1</sub> = F, R<sub>2</sub> = H)). <sup>1</sup>H NMR (400 MHz, methanol-*d*<sub>4</sub>) δ 9.03 (s,  
820 1H), 8.65 (d, *J* = 7.8 Hz, 1H), 8.31 (d, *J* = 5.8 Hz, 1H), 7.80 (d, *J* =  
821 11.5 Hz, 1H), 7.67 (d, *J* = 5.9 Hz, 1H), 4.08 (br s, 2H), 3.53 (t, *J* =  
822 6.8 Hz, 2H), 3.48 (t, *J* = 6.9 Hz, 2H), 2.07–2.00 (m, 2H), 1.95–1.88  
823 (m, 2H). MS *m/z* (HRMS) [*M* + *H*]<sup>+</sup> for C<sub>16</sub>H<sub>18</sub>FN<sub>4</sub>O<sub>2</sub><sup>+</sup>: calculated  
824 317.1408, found 317.1418.

1-(7-Methylisoquinolin-6-yl)-3-(2-oxo-2-(pyrrolidin-1-yl)ethyl)-  
urea (37) (Scheme 2A; Table 5). The same procedures as above were  
used for the synthesis of 1-(7-methylisoquinolin-6-yl)-3-(2-oxo-2-  
(pyrrolidin-1-yl)ethyl)urea starting from 4-bromo-3-methylbenzalde-  
hyde. 6-Bromo-7-methylisouinoline (43 (R<sub>1</sub> = Me, R<sub>2</sub> = H); 50%,  
over the first four steps). Compound 37 was obtained in 20% (24 mg)  
over the last four steps as described above. <sup>1</sup>H NMR (400 MHz,  
methanol-*d*<sub>4</sub>) δ 8.98 (s, 1H), 8.41 (s, 1H), 8.26 (d, *J* = 5.9 Hz, 1H),  
7.86 (s, 1H), 7.63 (d, *J* = 5.9 Hz, 1H), 4.07 (s, 2H), 3.53 (t, *J* = 6.8  
Hz, 2H), 3.48 (t, *J* = 6.9 Hz, 2H), 2.50 (s, 3H), 2.03 (p, *J* = 6.7 Hz,  
2H), 1.91 (p, *J* = 6.6 Hz, 2H). MS *m/z* (HRMS) [*M* + *H*]<sup>+</sup> for  
C<sub>17</sub>H<sub>21</sub>N<sub>4</sub>O<sub>2</sub><sup>+</sup>: calculated 313.1659, found 313.1662.

1-(1-Methylisoquinolin-6-yl)-3-(2-oxo-2-(pyrrolidin-1-yl)ethyl)-  
urea (38) (Scheme 2A; Table 5). The same procedures as above were  
used for the synthesis of 1-(7-methylisoquinolin-6-yl)-3-(2-oxo-2-  
(pyrrolidin-1-yl)ethyl)urea (36) starting from 4'-bromoacetophe-  
none. 6-Bromo-7-methylisouinoline (43 (R<sub>1</sub> = Me, R<sub>2</sub> = H)) was  
obtained in 27%, over the first four steps. Compound 38 was then  
obtained (2 mg, 2%) over the last four steps as described above. <sup>1</sup>H  
NMR (400 MHz, methanol-*d*<sub>4</sub>) δ 8.17–8.09 (m, 2H), 8.05 (d, *J* = 2.2  
Hz, 1H), 7.59 (dd, *J* = 9.1, 2.2 Hz, 1H), 7.50 (d, *J* = 6.0 Hz, 1H), 4.05  
(s, 2H), 3.52–3.45 (m, 4H), 2.87 (s, 3H), 2.03 (p, *J* = 6.8 Hz, 2H),  
1.91 (p, *J* = 7.1 Hz, 2H). MS (ESI) *m/z* [*M* + *H*]<sup>+</sup> for C<sub>17</sub>H<sub>21</sub>N<sub>4</sub>O<sub>2</sub><sup>+</sup>:  
calculated 313.2, found 313.2.

1-(3-Fluoroisoquinolin-6-yl)-3-(2-oxo-2-(pyrrolidin-1-yl)ethyl)-  
urea (39) (Scheme 2B; Table 5). To the mixture of 6-  
bromoisouinolin-3-amine (158 mg, 0.71 mmol, 1.0 equiv) and  
HF-pyridine (10 mL) at 0 °C was added dropwise a solution of  
NaNO<sub>2</sub> (243 mg, 3.54 mmol, 5 equiv) in water (5 mL). Upon  
completion of the addition, the cold bath was removed and the  
reaction was allowed to warm up to room temperature for 1.5 h at  
which point saturated NaHCO<sub>3</sub> solution (45 mL) was added. The  
reaction mixture was diluted with DCM (20 mL) and saturated  
NH<sub>4</sub>Cl (10 mL) solution, and phases were separated and aqueous  
phase further extracted with DCM (20 mL × 3). Combined organic  
layers were dried over Na<sub>2</sub>SO<sub>4</sub> and concentrated under reduced  
pressure. Crude material was purified by flash column chromatog-  
raphy to yield 6-bromo-3-fluoroisouinoline as a white solid (128 mg,  
80%). The same procedure that was used for the synthesis of 36 (last  
four steps) was repeated to obtain the title compound 39 (6 mg, 5%).  
<sup>1</sup>H NMR (400 MHz, methanol-*d*<sub>4</sub>) δ 8.79 (s, 1H), 8.10 (s, 1H), 7.99  
(d, *J* = 8.9 Hz, 1H), 7.50 (dt, *J* = 8.9, 2.3 Hz, 1H), 7.23 (s, 1H), 4.05  
(s, 2H), 3.53 (t, *J* = 6.8 Hz, 2H), 3.48 (t, *J* = 6.9 Hz, 2H), 2.02 (q, *J* =  
6.8 Hz, 2H), 1.91 (p, *J* = 6.8 Hz, 2H). MS (ESI) *m/z* [*M* + *H*]<sup>+</sup> for  
C<sub>16</sub>H<sub>18</sub>FN<sub>4</sub>O<sub>2</sub><sup>+</sup>: calculated 317.1, found 317.2.

1-(8-Chloroisoquinolin-6-yl)-3-(2-oxo-2-(pyrrolidin-1-yl)ethyl)-  
urea (40) (Scheme 2C; Table 5). To a stirring mixture of 5-  
aminoisouinoline (5.76 g, 40 mmol, 1 equiv) in pyridine (40 mL)  
was added acetic anhydride (5.7 mL, 60 mmol, 1.5 equiv), and the  
resulting reaction mixture was stirred at room temperature overnight.  
The precipitate formed was filtered and washed with cold hexanes  
(400 mL) in portions to give acetylated product (6.98 g, 94%). To a  
stirring mixture of 5-acetyl aminoisouinoline (3.36 g, 18 mmol, 1  
equiv) in DMF (30 mL) was added NCS (2.40 mL, 18 mmol, 1.0  
equiv), and the resulting mixture was heated to 65 °C for 3 days. The  
reaction mixture was then diluted with EtOAc (50 mL), and water  
(50 mL) was added. After separation, the aqueous phase was  
extracted with EtOAc (50 mL × 3), and combined organic layers were  
then dried over Na<sub>2</sub>SO<sub>4</sub> and concentrated under reduced pressure.  
Crude material was purified by flash column chromatography to yield  
desired compound (3.53 g, 88%).

To a solution of 5-acetyl-amino-8-chloroisoquinoline (1.0 g, 4.53  
mmol, 1.0 equiv) in DMF (10 mL) was added dibromocyanuric acid  
(1.3 g, 4.53 mmol, 1 equiv), and the reaction mixture was heated to  
65 °C for 3 h. After concentration, the obtained crude product  
resuspended in EtOH (45 mL), conc. HCl (9 mL) was added, and  
reaction mixture was heated to reflux for 3 h. The reaction mixture  
was then cooled down to rt and neutralized with 1 N NaOH to pH 7  
and extracted with EtOAc (100 mL × 3). Combined organic layers  
were then dried over Na<sub>2</sub>SO<sub>4</sub> and concentrated under reduced

895 pressure. Crude material (300 mg, 26% over two steps) was used for  
896 the next step without further purification. Crude material (300 mg,  
897 1.2 mmol, 1.0 equiv) was dissolved in EtOH (45 mL) followed by the  
898 addition of Ac<sub>2</sub>O (7.5 mL) and a solution of NaNO<sub>2</sub> (in 15 mL  
899 water) and NaHSO<sub>3</sub> (in 18 mL water). The resulting mixture was  
900 stirred at rt for 10 min, AcOH (7.5 mL) was added, and the reaction  
901 was allowed to stir at rt overnight. The reaction mixture was  
902 neutralized with 1 N NaOH (~350 mL) to pH 8–9 and extracted  
903 with EtOAc (250 mL × 3). Combined organic layers were then dried  
904 over Na<sub>2</sub>SO<sub>4</sub> and concentrated under reduced pressure. Crude  
905 material was purified by flash column chromatography to yield the  
906 desired compound (100 mg, 34%). The same procedures that were  
907 used for the synthesis of **36** (last four steps) were repeated to obtain  
908 the title compound **40** (51 mg, 30%). <sup>1</sup>H NMR (400 MHz, methanol-  
909 *d*<sub>4</sub>) δ 9.60 (br s, 1H), 8.40 (d, *J* = 6.7 Hz, 1H), 8.29 (d, *J* = 2.0 Hz,  
910 1H), 8.21 (d, *J* = 6.7 Hz, 1H), 8.12 (d, *J* = 1.9 Hz, 1H), 4.08 (s, 2H),  
911 3.54–3.46 (m, 4H), 2.07–2.00 (m, 2H), 1.95–1.89 (m, 2H). MS  
912 (ESI) *m/z* [M + H]<sup>+</sup> for C<sub>16</sub>H<sub>18</sub>ClN<sub>4</sub>O<sub>2</sub><sup>+</sup>: calculated 333.1 and 335.1;  
913 found 333.1 and 335.1.

914 *1-(Naphthalen-2-yl)-3-(2-oxo-2-(pyrrolidin-1-yl)ethyl)urea (51)*.  
915 Compound **51** was prepared according to a previously published  
916 procedure.<sup>22</sup>

917 Synthesis and characterization data for compounds **49** and **50** are  
918 detailed in the [Supporting Information](#).

919 **PRMT3 Biochemical Assay**. The radiometric scintillation  
920 proximity assays to evaluate the potency of the compounds were  
921 performed as described previously.<sup>22</sup> The reactions were done under  
922 balanced conditions using the biotinylated histone H4 peptide (Tufts  
923 University Peptide Synthesis Core Facility, Boston, MA) with the  
924 sequence of SGRGKGGKGLGKGGAKRHRKVLDRDK-biotin) as  
925 substrate and [<sup>3</sup>H]S-adenosylmethionine (Waltham, MA, Cat#  
926 NET155 V001MC, specific activity range 12–18 Ci/mmol) as the  
927 methyl donor.

928 **Selectivity Assays**. The methyltransferase selectivity of **29**, **30**,  
929 and **36** was assessed at compound concentrations of 1, 5, and 20 μM  
930 as described previously.<sup>22,25–27</sup>

931 **Cellular PRMT3 Assay**. Compound effects in cells were  
932 determined as described previously (PMID: 27423858, 25728001).  
933 Briefly, HEK293 cells were grown in DMEM supplemented with 10%  
934 FBS, penicillin (100 units/mL), and streptomycin (100 μg/mL). The  
935 cells were cotransfected with FLAG-tagged PRMT3/mutantPRMT3  
936 and GFP-tagged histone H4 (constructs described in PMID  
937 25728001) using 293fectin Transfection Reagent (Invitrogen),  
938 following manufacturer instructions. Cells were lysed in lysis buffer  
939 (in mM: 20 Tris-HCl pH = 8, 150 NaCl, 1 EDTA, 10 MgCl<sub>2</sub>, 0.5%  
940 Triton-X100, 12.5 U/mL benzonase) (Sigma), complete EDTA-free  
941 protease inhibitor cocktail (Roche). After 3 min incubation at rt,  
942 SDS was added to a final 1% concentration. Lysates were separated on  
943 SDS PAGE, blotted, and probed with indicated antibodies: mouse  
944 anti-GFP (1:5000, Clontech #632381), mouse anti-H4 (1:1000,  
945 Abcam #174628), rabbit anti-H4R3me2a (1:1000 Active Motif  
946 #39705), and mouse anti-FLAG (1:5000, Sigma #F1804). The signal  
947 was read on an Odyssey scanner (LiCor) at 800 and 700 nm.  
948 Fluorescence intensity of H4R3me2a was quantified and normalized  
949 to GFP and H4 signals for exogenous and endogenous histones,  
950 respectively.

951 **PRMT3 In-Cell Hunter Assay**. This cellular assay was performed  
952 as described previously.<sup>22</sup>

## 953 ■ ASSOCIATED CONTENT

### 954 ● Supporting Information

955 The Supporting Information is available free of charge on the  
956 [ACS Publications website](#) at DOI: [10.1021/acs.jmedchem.7b01674](https://doi.org/10.1021/acs.jmedchem.7b01674).

958 Synthesis and characterization data for compounds **49**  
959 and **50**, <sup>1</sup>H NMR spectra of compounds **29**, **30**, **36**, and **37**,  
960 and selectivity data for compounds **29** and **30** (PDF)  
961 Molecular formula strings (CSV)

## ■ AUTHOR INFORMATION

### Corresponding Authors

\*(F.L.) E-mail: [flu2@suda.edu.cn](mailto:flu2@suda.edu.cn). Phone: +86 (512) 65882569.

\*(Z.Y.) E-mail: [zhengtian.yu@novartis.com](mailto:zhengtian.yu@novartis.com). Phone: 18621082583.

\*(M.V.) E-mail: [m.vedadi@utoronto.ca](mailto:m.vedadi@utoronto.ca). Phone: (416) 976-0897.

\*(J.J.) E-mail: [jian.jin@mssm.edu](mailto:jian.jin@mssm.edu). Phone: (212) 659-8699.

### ORCID

Sun-Joon Min: 0000-0003-0867-4416

Matthieu Schapira: 0000-0002-1047-3309

Cheryl H. Arrowsmith: 0000-0002-4971-3250

Feng Liu: 0000-0003-2669-5448

Jian Jin: 0000-0002-2387-3862

### Present Addresses

○Shanghai Institute for Advanced Immunochemical Studies,  
Shanghai Tech University, Pudong District, Shanghai 201210,  
China.

◆Department of Chemical & Molecular Engineering/Applied  
Chemistry, Hanyang University, 55 Hanyangdaehak-ro,  
Sangnok-gu Ansan, Gyeonggi-do 15588, South Korea.

### Author Contributions

†These authors contributed equally to this work.

### Notes

The authors declare the following competing financial  
interest(s): K.Z., X.L., S.X., M.D., F.H., I.Z., Y.L., P.A., E.L.,  
and Z.Y. are/were employees of Novartis. J.L. is an employee  
of DiscoverRx Corporation.

## ■ ACKNOWLEDGMENTS

This work was supported by grants R01GM122749,  
R01HD088626 and R01CA218600 (to J.J.) from the U.S.  
National Institutes of Health. F.L. was supported by the grant  
21302134 (to F.L.) from the National Natural Science  
Foundation of China. The SGC is a registered charity (No.  
1097737) that receives funds from AbbVie, Bayer Pharma AG,  
Boehringer Ingelheim, Canada Foundation for Innovation,  
Eshelman Institute for Innovation, Genome Canada, Innova-  
tive Medicines Initiative (EU/EFPIA) [ULTRA-DD Grant  
115766], Janssen, Merck & Co., Novartis Pharma AG, Ontario  
Ministry of Economic Development and Innovation, Pfizer,  
São Paulo Research Foundation-FAPESP, Takeda, and the  
Wellcome Trust. GPCR, kinase, and ion channel off-target  
selectivity screening was kindly supplied by Eurofins-Cerep.

## ■ ABBREVIATIONS

PRMT3, protein arginine methyltransferase 3; rpS2, ribosomal  
protein S2; PABPN1, recombinant mammalian nuclear  
poly(A)-binding protein; LXRA, liver X receptor α; DAL-1,  
differentially expressed in adenocarcinoma of the lung, also  
known as 4.1B; SAR, structure–activity relationship; LHS, left-  
hand side; RHS, right-hand side; GPCRs, G-protein coupled  
receptors

## ■ REFERENCES

- (1) Bedford, M. T.; Clarke, S. G. Protein Arginine Methylation in Mammals: Who, What, and Why. *Mol. Cell* **2009**, *33*, 1–13.
- (2) Swiercz, R.; Person, M. D.; Bedford, M. T. Ribosomal Protein S2 is A Substrate for Mammalian PRMT3 (Protein Arginine Methyltransferase 3). *Biochem. J.* **2005**, *386*, 85–91.

- (3) Swiercz, R.; Cheng, D.; Kim, D.; Bedford, M. T. Ribosomal Protein rpS2 Is Hypomethylated in PRMT3-Deficient Mice. *J. Biol. Chem.* **2007**, *282*, 16917–16923.
- (4) Bachand, F.; Silver, P. A. PRMT3 is A Ribosomal Protein Methyltransferase that Affects the Cellular Levels of Ribosomal Subunits. *EMBO J.* **2004**, *23*, 2641–2650.
- (5) Landry-Voyer, A. M.; Bilodeau, S.; Bergeron, D.; Dionne, K. L.; Port, S. A.; Rouleau, C.; Boisvert, F. M.; Kehlenbach, R. H.; Bachand, F. Human PDCD2L Is an Export Substrate of CRM1 That Associates with 40S Ribosomal Subunit Precursors. *Mol. Cell. Biol.* **2016**, *36*, 3019–3032.
- (6) Tang, J.; Gary, J. D.; Clarke, S.; Herschman, H. R. Prmt 3, A Type I Protein Arginine N-Methyltransferase that Differs From PRMT1 in its Oligomerization, Subcellular Localization, Substrate Specificity, and Regulation. *J. Biol. Chem.* **1998**, *273*, 16935–16945.
- (7) Kim, D. I.; Park, M. J.; Lim, S. K.; Park, J. I.; Yoon, K. C.; Han, H. J.; Gustafsson, J. A.; Lim, J. H.; Park, S. H. PRMT3 Regulates Hepatic Lipogenesis Through Direct Interaction with LXRalpha. *Diabetes* **2015**, *64*, 60–71.
- (8) Fronz, K.; Otto, S.; Kolbel, K.; Kuhn, U.; Friedrich, H.; Schierhorn, A.; Beck-Sickinger, A. G.; Ostareck-Lederer, A.; Wahle, E. Promiscuous Modification of the Nuclear Poly(A)-Binding Protein by Multiple Protein-Arginine Methyltransferases Does Not Affect The Aggregation Behavior. *J. Biol. Chem.* **2008**, *283*, 20408–20420.
- (9) Tavanez, J. P.; Bengoechea, R.; Berciano, M. T.; Lafarga, M.; Carmo-Fonseca, M.; Enguita, F. J. Hsp70 Chaperones and Type I PRMTs are Sequestered at Intracellular Inclusions Caused by Polyalanine Expansions in PABPN1. *PLoS One* **2009**, *4*, e6418.
- (10) Lai, Y.; Song, M.; Hakala, K.; Weintraub, S. T.; Shiiio, Y. Proteomic Dissection of the von Hippel-Lindau (VHL) Interactome. *J. Proteome Res.* **2011**, *10*, 5175–5182.
- (11) Singh, V.; Miranda, T. B.; Jiang, W.; Frankel, A.; Roemer, M. E.; Robb, V. A.; Gutmann, D. H.; Herschman, H. R.; Clarke, S.; Newsham, I. F. DAL-1/4.1B Tumor Suppressor Interacts with Protein Arginine N-Methyltransferase 3 (PRMT3) and Inhibits its Ability to Methylate Substrates In Vitro and In Vivo. *Oncogene* **2004**, *23*, 7761–7771.
- (12) Jiang, W.; Newsham, I. F. The Tumor Suppressor DAL-1/4.1B and Protein Methylation Cooperate in Inducing Apoptosis in MCF-7 Breast Cancer Cells. *Mol. Cancer* **2006**, *5*, 4.
- (13) Allali-Hassani, A.; Wasney, G. A.; Siarheyeva, A.; Hajian, T.; Arrowsmith, C. H.; Vedadi, M. Fluorescence-Based Methods For Screening Writers And Readers Of Histone Methyl Marks. *J. Biomol. Screening* **2012**, *17*, 71–84.
- (14) Herrmann, F.; Pably, P.; Eckerich, C.; Bedford, M. T.; Fackelmayer, F. O. Human Protein Arginine Methyltransferases in Vivo-Distinct Properties of Eight Canonical Members of the PRMT Family. *J. Cell Sci.* **2009**, *122*, 667–677.
- (15) Wagner, S.; Weber, S.; Kleinschmidt, M. A.; Nagata, K.; Bauer, U. M. SET-Mediated Promoter Hypoacetylation is A Prerequisite for Coactivation of the Estrogen-Responsive pS2 Gene by PRMT1. *J. Biol. Chem.* **2006**, *281*, 27242–27250.
- (16) Obianyo, O.; Causey, C. P.; Jones, J. E.; Thompson, P. R. Activity-Based Protein Profiling of Protein Arginine Methyltransferase 1. *ACS Chem. Biol.* **2011**, *6*, 1127–1135.
- (17) Chen, X.; Niroomand, F.; Liu, Z.; Zankl, A.; Katus, H. A.; Jahn, L.; Tiefenbacher, C. P. Expression of Nitric Oxide Related Enzymes in Coronary Heart Disease. *Basic Res. Cardiol.* **2006**, *101*, 346–353.
- (18) Miyata, S.; Mori, Y.; Tohyama, M. PRMT3 is Essential for Dendritic Spine Maturation in Rat Hippocampal Neurons. *Brain Res.* **2010**, *1352*, 11–20.
- (19) Park, M. J.; Kim, D. I.; Choi, J. H.; Heo, Y. R.; Park, S. H. New Role of Irisin in Hepatocytes: The Protective Effect of Hepatic Steatosis In Vitro. *Cell. Signalling* **2015**, *27*, 1831–1839.
- (20) Siarheyeva, A.; Senisterra, G.; Allali-Hassani, A.; Dong, A.; Dobrovetsky, E.; Wasney, G. A.; Chau, I.; Marcellus, R.; Hajian, T.; Liu, F.; Korboukh, I.; Smil, D.; Bolshan, Y.; Min, J.; Wu, H.; Zeng, H.; Loppnau, P.; Poda, G.; Griffin, C.; Aman, A.; Brown, P. J.; Jin, J.; Al-awar, R.; Arrowsmith, C. H.; Schapira, M.; Vedadi, M. An Allosteric Inhibitor of Protein Arginine Methyltransferase 3. *Structure* **2012**, *20*, 1425–1435.
- (21) Liu, F.; Li, F.; Ma, A.; Dobrovetsky, E.; Dong, A.; Gao, C.; Korboukh, I.; Liu, J.; Smil, D.; Brown, P. J.; Frye, S. V.; Arrowsmith, C. H.; Schapira, M.; Vedadi, M.; Jin, J. Exploiting An Allosteric Binding Site of PRMT3 Yields Potent and Selective Inhibitors. *J. Med. Chem.* **2013**, *56*, 2110–2124.
- (22) Kaniskan, H. Ü.; Szewczyk, M. M.; Yu, Z.; Eram, M. S.; Yang, X.; Schmidt, K.; Luo, X.; Dai, M.; He, F.; Zang, I.; Lin, Y.; Kennedy, S.; Li, F.; Dobrovetsky, E.; Dong, A.; Smil, D.; Min, S. J.; Landon, M.; Lin-Jones, J.; Huang, X. P.; Roth, B. L.; Schapira, M.; Atadja, P.; Baryshte-Lovejoy, D.; Arrowsmith, C. H.; Brown, P. J.; Zhao, K.; Jin, J.; Vedadi, M. A Potent, Selective and Cell-Active Allosteric Inhibitor of Protein Arginine Methyltransferase 3 (PRMT3). *Angew. Chem., Int. Ed.* **2015**, *54*, 5166–5170.
- (23) Balz, G.; Schiemann, G. On Aromatic Fluoric Compounds, I.: A New Method for its Representation. *Ber. Dtsch. Chem. Ges. B* **1927**, *60*, 1186–1190.
- (24) Zhu, G. D.; Gong, J.; Claiborne, A.; Woods, K. W.; Gandhi, V. B.; Thomas, S.; Luo, Y.; Liu, X.; Shi, Y.; Guan, R.; Magnone, S. R.; Klinghofer, V.; Johnson, E. F.; Bouska, J.; Shoemaker, A.; Oleksijew, A.; Stoll, V. S.; De Jong, R.; Oltersdorf, T.; Li, Q.; Rosenberg, S. H.; Giranda, V. L. Isoquinoline-Pyridine-Based Protein Kinase B/Akt Antagonists: SAR and In Vivo Antitumor Activity. *Bioorg. Med. Chem. Lett.* **2006**, *16*, 3150–3155.
- (25) Baryshte-Lovejoy, D.; Li, F.; Oudhoff, M. J.; Tatlock, J. H.; Dong, A.; Zeng, H.; Wu, H.; Freeman, S. A.; Schapira, M.; Senisterra, G. A.; Kuznetsova, E.; Marcellus, R.; Allali-Hassani, A.; Kennedy, S.; Lambert, J. P.; Couzens, A. L.; Aman, A.; Gingras, A. C.; Al-Awar, R.; Fish, P. V.; Gerstenberger, B. S.; Roberts, L.; Benn, C. L.; Grimley, R. L.; Braam, M. J.; Rossi, F. M.; Sudol, M.; Brown, P. J.; Bunnage, M. E.; Owen, D. R.; Zaph, C.; Vedadi, M.; Arrowsmith, C. H. (R)-PFI-2 is a Potent and Selective Inhibitor of SETD7Methyltransferase Activity in Cells. *Proc. Natl. Acad. Sci. U. S. A.* **2014**, *111*, 12853–12858.
- (26) Eram, M. S.; Kuznetsova, E.; Li, F.; Lima-Fernandes, E.; Kennedy, S.; Chau, I.; Arrowsmith, C. H.; Schapira, M.; Vedadi, M. Kinetic Characterization of Human Histone H3 Lysine 36 Methyltransferases, ASH1L and SETD2. *Biochim. Biophys. Acta, Gen. Subj.* **2015**, *1850*, 1842–1848.
- (27) Eram, M. S.; Bustos, S. P.; Lima-Fernandes, E.; Siarheyeva, A.; Senisterra, G.; Hajian, T.; Chau, I.; Duan, S.; Wu, H.; Dombrowski, L.; Schapira, M.; Arrowsmith, C. H.; Vedadi, M. Trimethylation of Histone H3 Lysine 36 by Human Methyltransferase PRDM9 Protein. *J. Biol. Chem.* **2014**, *289*, 12177–12188.
